# Supplementary material
Source: PubMed Central journal article supplement (PMC8432742)
Supplement: NIHMS1699344-supplement-Suppl_1.pdf [file NIHMS1699344-supplement-Suppl_1.pdf]

## Supplementary Files 2

for

### **lncRNA *TUG1* as a ceRNA promotes PM exposure-induced airway hyper-reactivity**

Bin Li <sup>a</sup>, Nannan Huang <sup>a</sup>, Shengnan Wei <sup>a</sup>, Jie Xv <sup>a</sup>, Qingtao Meng <sup>b</sup>, Xiaobo Li <sup>a\*</sup>,

Rui Chen <sup>b, c, \*</sup>

<sup>a</sup> Key Laboratory of Environmental Medicine Engineering, Ministry of Education, School of Public Health, Southeast University, Nanjing, 210009, P.R. China

<sup>b</sup> Department of Toxicology and Sanitary chemistry, School of Public Health, Capital Medical University, Beijing 100069, P.R. China

<sup>c</sup> Institute for Chemical Carcinogenesis, Guangzhou Medical University, Guangzhou, 511436, P.R. China

\* Corresponding to: Key Laboratory of Environmental Medicine Engineering, Ministry of Education, School of Public Health, Southeast University, Dingjiaqiao 87, Nanjing, 210009, China. E-mail address: 101011116@seu.edu.cn (X. Li);

or

Department of Toxicology and Sanitary chemistry, School of Public Health, Capital Medical University, Xitoutiao 10, Beijing, 100069, China. E-mail address: 101011816@seu.edu.cn (R. Chen).

Sequence alignment between *TUG1-miR-222-3p-CELF1* (hsa) and *Tug1-mir-222-3p-Celf1* (mmu) network were exhibited as follow utilizing the EMBL-EBI search and sequence analysis tools (**Madeira, et al., 2019**) (<https://www.ebi.ac.uk/Tools/msa/mafft/>). Binding sequences among *TUG1-miR-222-3p-CELF1* (hsa) or *Tug1-mir-222-3p-Celf1* (mmu) network was marked yellow.

## Sequence Alignment 1

**Homo sapiens microRNA hsa-miR-222-3p (miR-222-3p), microRNA**

**Sequence ID: MIMAT0000279**

**Length: 21 bp**

**Mus musculus microRNA mmu-miR-222-3p (mir-222-3p), microRNA**

**Sequence ID: MIMAT0000670**

**Length: 21 bp**

**miR-222-3p sequence has 100% homology with mir-222-3p (3' – 5'):**

1-21

miR-222-3p UGGGUCAUCGGUCUACAUCGA

mir-222-3p UGGGUCAUCGGUCUACAUCGA

## Sequence Alignment 2

**Homo sapiens taurine up-regulated 1 (TUG1), transcript variant 1, long non-coding RNA**

**Sequence ID: NR\_110492.1**

**Length: 7598 bp**

**Mus musculus taurine upregulated gene 1 (Tug1), transcript variant a, long non-coding RNA**

**Sequence ID: NR\_002321.2**

**Length: 4731 bp**

**TUG1 sequence has 59.1% homology with Tug1 (5' – 3'):**

1-80

TUG1 TCCTGCTTTCCTGACCCTCTCCGCCATTTAAAGAAACAGTACCGGGGGCGGGCCGAGCGACGCAGCCGGGACGGTAGCTG

Tug1 -----

81-160

TUG1 CGGTGCGGACCGGAGGAGCCATCTTGTCGTGCGCCGGGAGTCAGGCCCTAAATCGAAGAAGCCCTGGCGGCCCTCC

Tug1 -----

161-240

TUG1 CCCCCTCCCGGTCTGGTAGGGCGAAGGAACGGGCGTGCGGTCGATCGAGCGATCGGTTGGCGGCTCTTCTCCTGCTCT

Tug1 -----

241-320

TUG1 GGCATCCAGCTCTTGGGGCGCAGGCCCGGCCGCCGGCGCGCCCGGTGGCCGTTGGCGCTCGCGCCGCGTCTTTCTT

Tug1 -----AGGCCCGGCCGCCGGCGCGCCCGGTGGCCGTTGGCGCTCGCGCCGCGTCTTTCTT

321-400

TUG1 CTCGTACGCAGAAGCTCGGGCGGCGGCCTATGCGTTTGCATTTCGACGAGGAGTCGTCCGGGTGGTCGGCGGCGGGCA

Tug1 CTC-----

401-480

TUG1 GCTGCTCCGCCCCGCTCCGGGGGAGGCGGCGGCGCAGCGGCCGCGGGATTGGAGCGCCGGGGAGGCGGGGTGGCCG

Tug1 -----

481-560

TUG1 GGGCCGGCTTGGAGGCCTGGCGCCACCCTTCGGGGCCTGCAAGGACCCAGTTGGGGGGCAGGAGGGGCCGGAGGATGG

Tug1 -----

561-640

TUG1 TTGGTTGTGGGATTCTACTTTGCCTTTTCCTCCTTATGCCGCTTAGTGAGGGGCGGGAGCTCTGGCGGCAGCCCCGGG

Tug1 -----

641-720

TUG1 GTGGGAGACGAGCTCCGGAGTCGGAAGAGCTGGGTTTTCTTCCGGGCCTAGCCACCAGTTGGCGGAGTGACCTTAGCCG

Tug1 -----

721-800

TUG1 AGTCACTCTGTAATTTGTCTGCGCCTCAGTTTCCTCCTCTGCCTATCAATGTGTGTGGGTTGAAATCGCTTTGTAAACT

Tug1 -----

801-880

TUG1 ATAAAGCGTGGGTGTACGTAAAGGATGGTTATTGTTTATAATTTTTTTGAGTTGTAAGAAAACCTTAGCAGTTCCCAAT

Tug1 -----

881-960

TUG1 CCTTGGGTTTTGAACCTGGGAACCTTGATTGGAGTTGGGGATCCCAAACTTCCTGAAATTGTGGGAATGTGCGGTTTG

Tug1 -----

961-1040

TUG1 GGGGAATGATGGGAATTTGTGGGAATGTGCGTTTTAGGGGAATGATGATCCATCGCTAGCAAGTTTTCCAAGGGGCTGT

Tug1 -----

1041-1120

TUG1 GACCCAGAAGAGTTAAGAATCACAATTTCTTCATGCTACAGAGAGGAAACTGAGGCCTAGATGTCATTTGGGACCCTTCA

Tug1 -----

1121-1200

TUG1 CAACCATTTTGAAGCCCTGTTTGTGAGTCCCTGGGATATGTGAGCTGTTTCTATGCATAATGGATATTCGGGGTTAACAACA

Tug1 -----

1201-1280

TUG1 GTCCCCTGCTGGCTTCTATTCTGAATCCTTTTCTTTTACCATGGGGTGCCTGAAGGGTGGCTGATGCATATGGTACAAT

Tug1 -----

1281-1360

TUG1 GGCACCCAGTGTAAGCAGCTACAATTAGGAGTGGATGTGTTCTGTAGCATCCTATTTAAATAAGCCTATTTTATCCTTT  
Tug1 -----

1361-1440

TUG1 GGCCCGTCAACTCTGTTATCTGCTGCTTGTACTGGTGCCTGTACTTTTCTGACTCTCATTGACCATATCCACGACCATG  
Tug1 -----

1441-1520

TUG1 GTTGTCATCCATTACTTGATCCTACTTTACATGTCTAGGCTGTGTGGTTGGTGGTGAATAGGCTTCTTTTTACATGGTGC  
Tug1 -----

1521-1600

TUG1 TGCCAGCCCAGCTAATTAATGGTGCACGTGGACTTTTAGCAAGCGGGCTCACTGGAAGAGACTGAACCTGGCATGGAATT  
Tug1 -----

1601-1680

TUG1 CCTGAAGATGTTGGGGTTTTTTCTTTCTTAATCGAAAGTTAACATTGTCTGAAAAGTTTTGTTAGAACTACTGCGGAA  
Tug1 -----

1681-1760

TUG1 CCTCAAAATCAGTAGATTGGAAGTGATTCAAAGCTAAACTTTTTCTTGGCCCTCCTTGTTCTAATTGCTTGCAAGT  
Tug1 -----

1761-1840

TUG1 GTAATACTAGGATGTCCAAGATGCCAGTTTTTGCTTCTTTGTTAGTTGTCAGCTGCTTTTATCAAATTCAGGCCATTAT  
Tug1 -----

1841-1920

TUG1 CCAACAAACTATAAAAAATGTTGAACAATTGGATTCAAACATTTTCGTTTTGTGGAGTGGTGCTACCAAGTGGTAC  
Tug1 -----

1921-2000

TUG1 AGCCCTAAGCAAGTGAACACAAACACATTTAAGTGTATTTTGCTGATTAGATGTTAGCCAGTTATGCTATTTTCATTCAA  
Tug1 -----

2001-2080

TUG1 ATGTCTGAAAAAATCAATTGACTATTCCTTTTCCTAAAGGGCAGAGACAGATAATCTCACTCCAGAGAAATGAC---T  
Tug1 -----GGCCAGAGACAAATGGTTTCCTTTCAAGAGAAATGACTGTT

2081-2160

TUG1 TGGAGAAAAAAGTGTGGTCTTTTTGCTCTTTTGTAATTAATCCGGATGTACCTCAAAGAC---TTAAGACTGTGG  
Tug1 TTGAAGAAAACTCTGTTGGTC--TTAGCTCTTTGTAATTAATCTGGATGTACCTCAAAGACTCTTTAAGACTGTGG

2161-2240

TUG1 TGATAAGATGCTTTCCTCAGCAGAAAGGAGGGAAA-AAAAACAACCTGGAACCTC-AAAGCTTGAAATCTGTGGCAAAAACA  
Tug1 TGTAAAAGGCTTTCCTCTGGAGAAGGAGAAAAATAAAATCAACTGGAACCTAAAAGCTTGAAATCCATGACAAAACA

2241-2320

TUG1 TGAGATGTCCAGGATTGGAGGTTGAAAAGATTTCACTACAGTGTTCGCAATAGTTGGAGCAGAT--AACTTTCAGTGTA  
Tug1 C-AGATGTCCAGGATTGGAGGTTCATAAAGT-----ACATGCAGTAGTTGGAGTGGATTCCATTTTCAGTGTA

2321-2400

TUG1 GCCACAGCCATGGACTCCAGATTTCCAGATTTTCAAGACCTGGACCTGGAACCCGAAAGAGCTTGTCACGATGCGGCAGG  
Tug1 GCTGCCACCATGGACTCCAGGCTCCAGATTTTCAAGAACTGGACCTGTGACCCAGAAGAGCTTGTC AAGATATGACAGG

2401-2480

TUG1 AACACTGGAGGTAGATTTTTTTTTATTTTTGAATTTTGGGACTGTTGACCTTGCTGTGAGAAAAGAGACA-ACGACTGAG  
Tug1 AACTCTGGAGGTGGACGTTTT---GTATTCAATTTTGGAACTGTTGATCTTGCCGTGAGAAAAGAGAGACACGACTCAC

2481-2560

TUG1 CAAGCACTACCACCAGCACTGTTACTGGGAATTAGAAGACCTGAGTTTCTGTCCAGACCCTCAGTGCAAACCTGAGGATGC  
Tug1 CAAGCACTGCCACCAGCACTGTCACTGGAACTTGAAGATCCAAGTTTCTGTCCAGAACCTCAGTGCAAACCTGACAACAC

2561-2640

TUG1 TCCATCCAAAGTGAATTATGATAGCAGACTCCTTGAAAGCAGGGTCTTGTGTTAGTGCATCTTGGCCACATACACCACA  
Tug1 TCCATCCAAAGTGAACCTACGTC-----CCGTGCCTCCTGATTGCTGAATGTTACCTGGACCTGCCA--

2641-2720

TUG1 ACATATCAAGATGCATTTATTAGGAAGGAGGAGTTAGAGAGCAGGCTATCAGAATAACCACTCACCTACAGACCTGGTA  
Tug1 ----ATGACCTTCCTTCTGCTA-----CTCCATCAGCCTACAGACCTGGTA

2721-2800

TUG1 CCTGGATTTTTGCCCGAGATGATTCTTACCACCTTACTACTGACGAAGACACCCATTCCAGTGGACCACTGTGACCCAGG  
Tug1 CTGGATTTTTGTCCATGGTGATTCTTACCACCTTACTACTGAAGAAGACA-CCATTCCAGTGGACCACTGTGACCCAAG

2801-2880

TUG1 AGGCATTCAGCCATCATGATGTGGCCTTTACCTCCACTCCTGTCTTGTCTACCCAGATTCAGCACAGCCCTTTATAGTG  
Tug1 AAGCATTCAGCCATCATGATGTGGCCTTTACCTCCACTCCTGTCTTGTCTACTCTGCCAGATTCAGCACAGCCCTTTATAGTG

2881-2960

TUG1 AAGTC-AGAGTCTCAAGCCAAATAGCTAAAGCTGTTTTATCACAACAAAGGCCAGTTTGTTCATGAGTGTGCATTTTC  
Tug1 CAGTCAAGAGTCTTCAAGCCAAATAACTGAAGCTATTTTATCACAACAAAGGCCAGGTTTATCCATAAATGTACAGTTC

2961-3040

TUG1 ATTTCTTCAGTTAAAGCCTTCAGAGACACACAATAAATTTGGACCAGGGGATT-----TTTTAGTTATTAATGCTCT  
Tug1 ATTTCTGCAGTT-TATTCTTCAGAGACACATAGTAAATTTGGACCAGGGGATTTGTTTTGTTTATATTGTCAACACTGT

3041-3120

TUG1 CTGAAGAAAAGGCAACATCTTTTTGAGAGCAGCATTGGACCACACCCCAATCTCAAATGATTGAAA-TTCATGAAC-AT  
Tug1 CTGAAGAAAAGGCA-----TCTCTGAGAACAGCATTGGACCCTACTCCACAATCTCAAATGATTGAAGTTTCATAAACTGC

3121-3200

TUG1 CTAGGATCCCGTGAAGGTCACCTGGACCC---TGTTTTTCTACTTCAAATCCTGTAGTAGCCTACTGAATGAGAAAAC--  
Tug1 CTAGGATCCTGTCAAGGCCACTGGACTCTTGTCTTTTCCTACTTCAAAATCTGTAGCTGTCTACTAAATGACAAAGCAG

3201-3280

TUG1 ATATTCTGACCCATTGGGATCAAATCAAAGGCACAGTGAACCTCATAGCATCTTCTTTGGAATTACTCAGGAACCAGA  
Tug1 ATATTCTGACCCATTGGGATCAAACCAAGGCATTTGAATTCTCATAGTATCATCTTCGG-GTTACTCAGGAACCAA

3281-3360

TUG1 ACTTTTTACACAAATGTAAGAAATTCTACCAAGGAGTCCCTTACCTAACAGCATCTCACAAGGCTGC-ACCAGATTCCA  
Tug1 ACTTTTACACCAATTTAAGAAATTCTACTGAGGAATCCCTTTACCTAAC--CATCTCACAAGGCTCAACCAGATTCTC

3361-3440

TUG1 GAAAAGGCTTCTCTTGATACATCAAGGTAGAACCTCTATGCATTTTGTGACCGACTTATTCTTAGATCATTGGTTTTCCA  
Tug1 GAAAAGGC--CTCTTGATATATCAAGATAGAACCTACATGCATTTTGTGAACAACCT-----ATCACTGATTTTCCA

3441-3520

TUG1 AAGGCTTTGTGGCCATGAAGCCCTTTGAGTGAAAACCTGTGCAGAAGCCAGAGTAAAAGTGAAGCTGCTCTGGATGAAGT  
Tug1 AAGGCTTTGTGCTCTTGAAGTCTTTGAAGGAAAGCTGTGTGGAAGTCCAGAGT-AAAGTGAAGCTGCTCTGGATGAAGT

3521-3600

TUG1 AGTGAAGCAAGAGTAGGGCCTGAATCCTGTACAACCTATCTCCTTTACCACCGTGGTGACACCTAAGGGGACTTCCTT  
Tug1 AGTGAAGTGGGAGTTGAGGTCTACAACCTGCCACAACCTATCTCCTTTACCACCATGGTGATGCCAAAAGGGACTTCCTT

3601-3680

TUG1 ACAACACCTTGAACCTTCCGAACACAGTTTGAAAACCACTGCCCCAGACAGCAATATGTTTGACCTGAATGGCATTCCA  
Tug1 AAAGCTTTCAGAAAATCCTG-----CTTGAAACCACTACCCTAGA---CAACATGTTTGACCTGGATGGCAT----

3681-3760

TUG1 ATCTTTTCTGTACCTCCACTCAGCACAGTTCATGTTTCAGTAGATGCTGAACATTCTTAGAAAATACTGTGTGTGAACCTTAG  
Tug1 -----TCTCTTCAAAACAATTCATATTCAGTTGATGCTCAACATGTTTGGAGATGC-----

3761-3840

TUG1 AAAAGTGCAAGAAGACAGGCATGTCTTTGACCCAGGAATGATCATTGCTGAAGATGGTGTCAAGTGAACCTAGATTAA  
Tug1 -----TTTATTGAGAGATGATGA--TAATTACAGCATTGTCTAATGAAGTTTATTAA

3841-3920

TUG1 CAGCCCTCCACTCCAGATGGATATCCAGTGATTCCTAGAATGGGATATAGCCAGAGAACAATTC-TATGCACCCTACACT  
Tug1 TAGCATTCCATCCAAGTGGAC-----TTCTGGAGTTGGATATAACCAGAGCAATTCATATGTATCCTACACT



3921-4000

TUG1 GACGACTCCCTTAAGCAACACCAGATGCT--CTACTGGTACTTGAAGTACATGACTTTGAAGTCTTGACCCTCCATGAA  
Tug1 GAAGAACACCATTAACCTTTCAGCAACCTATAGCTAGTGGTACTAGAAGTACGTGTCTTGAAGTCT-----ATGA-

4001-4080

TUG1 TACCTGAATTATCAGCAAGCGGTTTTGAAGCTGGTGCCTCATTGAGGCCATATTAGAGCAACTTGTACATTTGACCTCT  
Tug1 -----GAGCTGGTATTGAAGCTGATGCCTCCTTAAGGCCATCTTAGACCAAGTTGTTGTTGACCTCT

4081-4160

TUG1 TGTTATCAGCCATGGTACTCTACTTCGTGTGCAAGAGATAACTATGAAAGCCAAATTCAAATACTGGCAACATTTCTTAA  
Tug1 CCTCATTAACATATGG-----AGCAGAATTGAAATAC---AAATTTTCTTAA

4161-4240

TUG1 AGGGGCTCAATATCTATCATTTCGTCTCTTTTCCAAACTACACATCACTGTATGACTCAACCAGTAGCAGTTATATTGCC  
Tug1 AGGGACTTGAACCTGGTTATCATTCAATATCTCAAGTTCAAGTCAT--GTTGATGCAACCAGTAGTTATTAACCTGCT

4241-4320

TUG1 CCTTGGTTTTTATTCAGTTAACTACTGTTTCCAAGATAAATGAGCTAATAAGCTTTAAAAAAAAAAAAAAAAAGGCTG  
Tug1 CCATGGTTTTTGTTA--TTAATACTTTTCCAGGG-----CTTAAAAAAAAAAAAATTA---CTTAA

4321-4400

TUG1 AATTCTTTTTTCTTCATCACTGGCATATCTGCCTATTCTCCAGAATTATTATGACTATTAGCTCACTTT--AACAGTTG  
Tug1 -----TTTCTCCAACACGTCTATACTGTCTGTTCAAAAG-----TAACTACTACCACTATATGGAACAGATG

4401-4480

TUG1 AACTTCAAGCGACAATCTTTGAACACCCCTTCTCA---TGTGATTTAAATGAAACCATTTGGAAAAGTTCTTCTAGC  
Tug1 ATTCTGAAG---ACACTCTGAGCATCCTTATGATATTTGTGACTTAAATGTGGC---TGGAAATTTCTTCTTACC

4481-4560

TUG1 CAGTAATAGATTTTTTTTTTAATTGCTCTGCCTTGTGCCGAGAGATGTTCTTTTAAAGATGAATCTTTTGATGTCTGATAC  
Tug1 CAGTGAAATATTTAATGATTAG-----TCTTCATGCCTGATAC

4561-4640

TUG1 CACCAA---ATATAGGTGGTAGGGAGAGTTGGAGGCTGGCCCTTTGAGC-AGGCCATTAGCTTACTTGCTGGGCATTTT  
Tug1 CATCAACTGTATATGCGTGATAGGCAAAGTTGACATAGGCATTTGACTCTAGGCTAT--GATAGCTTGCTAGTAACTTC

4641-4720

TUG1 CGATAGCTTATTGCCTACCTTTTTGCTGAAA---CAAAGTATTGAAAAACAAATCTATGAAGACTGCAGCTAAGGAT  
Tug1 AAGTAGCATATTGTCAACCTGTTGCTGAAAAGTAGAGTAACTTGGAAAAAAACT-----AAATGGCAGCTAAGGAT

4721-4800

TUG1 TTTATCGGTAGACTTAAGAGCTTTTGTCTTGTGGATATTTAGTGAACCACATCAGTCTCAATACTGTCAATTTTACAC  
Tug1 TTTTTCA-GTATTCCTGAGTTTCTGTCTTG-GGATATTTCAATGAAATTTTAC-----CTGTCTTCACTT

4801-4880

TUG1 TGACTCAGAGCAGCTGACTTCATTCCCTTGCCATGATATATATTTAAGGCAGGCATTGTAACAGACATAAAGACAACCTTAT  
CelF1 AA---CAGAGTGACTGAC-----TCCTTACTATGAAGTATTCTTA-----AGACATTAAGATTACTTTT

4881-4960

TUG1 CTGTTTCAGCAGGAAGGATTTCAGTTTATGAACTCTCAGACCAGATCATGTTGAACAAGGAGACTTTGATGTGTGCATGA  
Tug1 -----GTAGAAAGGATAAAATTCCTGACCATCCAAATC--ATCATAGTGAACA---AGACTTCAATTTGTGACCTGA

4961-5040

TUG1 GAAAACCTC--ATTCTTTACTTCCCAGTCAATTTAAAGGCCAGCTATCCTGAGCTACTCGAATGAATGCACTGGTTAAACA  
Tug1 GAAAATCTCATTCTCTACTTTCGTAGTCAATGTAAGGGCCAA--TGCTATCAGCTACTC---TGAGTGCACTGGGTAAACG

5041-5120

TUG1 TTGGAATAGTTTGTATATCCTTGCTCTCT---CTCTAGGCCAATTGTGATTACATGACTCGACTCTACATCTCGTCA  
Tug1 TTGGAAGTGCCTTCTTTATATCATTACTTTTTATCCTCTAAATTAATCATGGTTATGTAATTC--TCGCCACAAATCAGCA

5121-5200

TUG1 AACAAGGCCTAGGTCTGGTTGCTGTAGACTGCTCGCCCTCAACAAAT-AAAATCTGGTTGACTAGCCTCCTGTATATAC  
Tug1 AATCAGACTCAGATCTGGTTATCTAGACTGCTCACAGTTAACAAATCAAACCTCTGGATGACT--TCTGCTGTATATGC

5201-5280

TUG1 AACTATTATTTGTTAAGAAGAAATTCGTCATTTTCTACTACCTTCCAATTGTCAGCTCTTTTTTCTCTCTGGTTT  
Tug1 AACTACTATTTGTAAGAAGAAATTCGTCATTTTCTACTACCTTCCAATTGTCAGCTCTTTTTTCTCTCTGGTTT---

5281-5360

TUG1 TTCTTACTTTACAGAAAAAGACATTGATCTATACTGCCATCCCTCTAATCCTGCCATACTCAGTCAAAAGGAATGAC  
Tug1 -----TATTAACAAACAAAAATAAGCTACACTGCCAGCTATCC--CTCCTGCCATACTCAGTCAAAAGGAATGAC---

5361-5440

TUG1 TTAAGATGAAGATGATCATCTGCTCGAGTCTAAAATATACATTGTATATAAGAATTGGTGATTAGAAAAGCAAAAACCT  
Tug1 -----GAATCGGGAATCTAACCAGT-----GAATGGATAAGTAGAAAAAACTAAAACCT

5441-5520

TUG1 -----AAAACCTAAATCTAGGAGTCTGTATACTGTCTCCATGTCTCCATGCCTCAGATCTCATCTAAATCTTTGAACAG  
Tug1 AAGGCAAAAGCCTTAATCTAGGGCCTTTTCTACTATCTTCATGT-----CTTGGATTTTCATCTAAAATC---AACAG

5521-5600

TUG1 CACCATTCAACCAATCTGAGGCCTTGACTTGCTTGAAGATGATTCTCAGAGATCGGCTGAGTAAAAAAGATGACGACT  
Tug1 TGCCACCAACCAGTCTGAGGCTTGACTTGCTTGAAGATGATTCTTAGAGATGGGCTGATTACAGAAGGTGAAGACT

5601-5680

TUG1 TGATTACCAAGAAAGTAGGGCCAACCTTTGACAAATCTGGCTCTGCTGACCCTGTCACTCC **CAGATGTAGC** ATAGACTCC  
Tug1 TGATTACCAAGAAAGTAGAGCCAACCTTTGACAAACCTGGCTCTAC--AATCTATTGCTTC **CAGATGTAGC** ATAGACTCA

5681-5760

TUG1 TAAACAGAACCTCAAGTCTG-ATTGAGGATAAAGGCCTTCTCCTGAGCTGAAAGTTCTT-TGGCAGATGAGCAAGAAACTG  
Tug1 TAACTAGAACCTCAAGTCTGCATTGAGGATATAGCCTT---CTAAGCTGACAGTCTTGCAACAGGTGAGCAAGAAAATG

5761-5840

TUG1 AAAGCTGATGTACCTGACTGGCTCTGTAAGATCAGAAAACCTGTATCCAGAATAAGCCCTATGGATTAACCCCTGAGTACC  
Tug1 AAAGCTGTTATACCCAACCTGGCCCTTAAAGATCCAAAATAATGTCTGGACTAAACCCCTATG-----GAGTACC

5841-5920

TUG1 CAGAGTAAAACTAATTTACAGAACTTCCTTATTGATCTGCTGGTCTTCCAGATCATATTCTGGCTATTGGTATGGCTG  
Tug1 CAGGACAAAACTAATTTACAGAGCTTCATTATTAATCTGCCTGTTCTTAG-----CTTAATTATTGGTATGGCTG

5921-6000

TUG1 GCCTTTCTGAAGGTACCCTGCTTGTCTATTTTCTGAC-TCAGCTCTTG--CCTGCCTTTTTCACATGTTGCTGCAATTA  
Tug1 GCCCTACTGAAG-----TAGTTTGTCTGTTTACCTGCTTCAGCTCTAACCTGGCTATTTTGACATGCTACTGCAATTA

6001-6080

TUG1 GACTCAC-----CGTGAGGACTACAGTCAATTTAGTCTATCTTGTGCCAA-TACAACAAGGATTTTAAATAGTAACA  
Tug1 GACTAACTGGCTTTGAGAAGACTACAATCAGTTTCAGCTCTCCTTTGCCAATTTACCAAGGAATTTTGATAAGAGGA

6081-6160

TUG1 ACCCACACCTCACCCTAGGACTCAATGTTACAAACAGGAAGGACCATTGCTGCATACTCCTTGACCAGCAACTTTTTT  
Tug1 ACCCATACCTCACCC-----CACCAGAACAGAAAGGACCA-TGCTGCATATTCCTTGACCAGCAAC-----

6161-6240

TUG1 GAAGATATTTTAAAGTGCAGAGTAGGCCTCTATTCTGTATGTAATTGTTTATTTCAGCACCTGGAACCTCATCTATCG  
Tug1 -----TTTAAAGTAGAGAACAACCC-----TGCTTGTTTTCAACATCTGAAACACCATT-----

6241-6320

TUG1 GGTCTGGAAGGAATACAGCAGTTCGAAAGCCGCTCCATTTCT--CTCCTCAGTAGTGCAGAAATGAGTCCGATTACC  
Tug1 GATCTAATAGGAGTATAGAAGGTTGACAGCAGAGTACTACTTACTTCTTTCATAACTCAGAAATGAATATGACTGGCC

6321-6400

TUG1 AGTACACACAGAAGTGTACCAGTTCAACCTAGCAAAAAGA-----AGAAAAGTTTCCACTGTACTTAAAATTTACAG  
Tug1 -----CAGAAGT-TGTAAGTTCACCTTGACAAGAAACAGCAACACCAGAAGTTTACTGCTGAACTT--AACTTGCCA

6401-6480

TUG1 CTGACTCAAATTCCTCACAGAATTAATTTG--ATGTAGAAGGCTAGTTGTCTTACTTCAGATCAGCAGGACAGTTGGGCT  
Tug1 CTTACTCGAATAGTCTCACAGACCTGCTTGCCAAGTAGGAGGCTAGTTTTCTGCTTCATATCACCATTGGAGTGGGGCT

6481-6560

TUG1 C--TCAGACTCATG--ACCACTGAGTTG-----CTTGTGTTGAAACTGTGGTTTCATCCAACATATGCTATTGGAC  
Tug1 CAATGGGGTCAATGTTAATACTGACTTGAATGGGGACCTTATGGTGAATCCTAGACTATG-----AGGCTAATGGAA

6561-6640

TUG1 ATGATTATTATTCCATTCAAATGGATTACAGACTTCTTGAGGACAGGACAAACTTATCTCTCATGGTGTTTTTTTAGAAAT  
Tug1 ATTATTG----TCTATTCAAGTGGATTATAGATTTCTTGAGGACAGAACAGAC--ATCACTCCTGGTGATTTTTAGAA--

6641-6720

TUG1 ACCTTTATAACCAAGGAAGAAACCATGCCAGCTGTTACCATTCAACTTCTTAAGCAGAGATTAAGCTTTTTTCATATCTGT  
Tug1 --CTTGATTACCAAGGAAGAA---ATACCAGCTGCTAACAGTCAACTTCATGGGCAAAGATTAAGCTCTCT-ATATCTGG

6721-6800

TUG1 TCTTATCCTGGACATCAGTAGTTTTTAATTGCCAGCATCCG-TTCCATCTTGTA-ACAACTCCCTGATGTTTCTTAAAA  
Tug1 TCGTATCCTGGATGC---TAGTTTTTTATTGCCAGTGACCATTCCATCTCACGCTTAACTTCCTGATGTTTTTTGGAA

6801-6880

TUG1 CCACCTCTTCTATTTTCAGTCT--GTGGTTGGACAGTCTGACCCAACCTTGAGCTTTGTGGGTGAACATGTAATTCAG  
Tug1 CCATCTCTTCCAATTTTCAGTCTGGTGATTTAGACAGTCT-----TTTCATGCTGGACATTTTGTGCA

6881-6960

TUG1 ACCTCATCAATCA---GCAAATCCATCTGAACT-----  
Tug1 ACCTCATCAATCACAGCAAAGTCCATCTTGACTTTAGTGATTAGTTCAGGAATGGATGCATGATTCAAGTTGTCCAATG

6961-7040

TUG1 -----GTGGAGGAGAAGCTCTCTTTACTGAGGGTGCTTTAGCTTTGTAGGATGAAAACCT  
Tug1 ATAATCAACCCTAGGTGTTTTCTCAGTTGTGGAGAAGTCTCTT-----AGATGCTTTAGCTTTGTAGGA--GAAAACCT

7041-7120

TUG1 CAAACTAACAGGGCCTA-----  
Tug1 CAAACCAACAGGGCTACCTACTATGTTGAATGATTGTAGGAGAAAACTCAAACCAACCAGGGCTACCTACTATGTTGAA

7121-7200

TUG1 ----CCATGTAGAGAATGAAGCCAGTGCAGGGGAAAGCAGAGCCAAAATATGGAGAGACTTGAATCCTGATGACAGCGTT  
Tug1 TGAGCCAGGCAGAAAATGAAGCCAGTACAGAGGAAATGGAGCCAAAAGGAAGAGACTTGAGTTCTGATGATCACATT

7201-7280

TUG1 TGTGCCCTGGATCCAACCGTGCCTGAAGC---TAGAATATCCCCTGGACTTTTCAGTTATGTGAACCAATAAATACCCT  
Tug1 TATGCCCTGTATCCAACGTGCCTGAAGCTAATAGTACATCACCTGGACTTTTCAGTTATGTGAACCAATAAATCCCC

7281-7360

TUG1 TTTTTGCTTAAGTTACTTTGAGTTGGGTTTCTGTTACTTGAATTGAATCCACACTAATATATCTACCAACATTGAGACT  
Tug1 TTTTTGTTAAGTTACTTTGAGTT-----

7361-7440

TUG1 TGACAGATCCAAGTATTTATTAAGCTAGAGGTCATGGTCACTGAAATTACTTTCCAAAGTGAAGACAAAATGAAACAGG  
Tug1 -----

7441-7520

TUG1 AACTGAGGGAATATTTAAGATCCCACAGAAGCGTAAAAATGACATGGTAGAAAGTAATAGAAAACCTAAATGTCTGTGCAT

Tug1 -----

7521-7600

TUG1 TAAAGGATAGGTTAAGGTGTGGTTCAGCCATATAGGAATATCTCGTATCTGTTAAAATGAATAAAGTACATTCATTGTGT

Tug1 -----

7601-7680

TUG1 ATGGAAAAATGGCCATGATACATTAGGTGAAACAAGTTATTAATAGAAAAGTGTACAGTGTGAACTCATTTTAAAATGTG

Tug1 -----

7681-7760

TUG1 TGTGCTTATGTTTATAAATGCATAGAAAGGTCTATTACAGCTTTCTTTGAACAGTGTAGATCACATGAAACTTTCAACT

Tug1 -----

7761-7840

TUG1 TTATACATTTCTGTATTAATATTTTACACTACCCACATTATTTTAAACTTTATTTTAAATAAAGAATTTTAAAATTA

Tug1 -----

7841

TUG1 A

Tug1 -

### Sequence Alignment 3

**Homo sapiens CUGBP Elav-like family member 1 (CELF1), transcript variant 1,  
mRNA**

**Sequence ID: NM\_006560.4**

**Length: 4594 bp**

**Mus musculus CUGBP, Elav-like family member 1 (Celf1), transcript variant 1,  
mRNA**

**Sequence ID: NM\_017368.3**

**Length: 4873 bp**

**CELF1 sequence has 97.8% homology with Celf1 (5' – 3'):**

1-80

```
CELF1      GGC-----  
Celf1      CGCCGCGGTGGTACGTTCCCTTCGCCGCCGCCCCCTCCGCGGCGGCCCTCCCCGCCGTGGTAGGTGCCGAAGTGCC
```

81-160

```
CELF1      -----AGCGGCAGCGGCGGGACGCGGAGGCTCCCCCGG  
Celf1      GCCATTTGGGGTGTCTGCTCTGGCGGCAGCGGCAGCGGCAGAGGCGGCGGCGGGACGCGGAGGCTCCCCCGG
```

161-240

```
CELF1      GATTCGGCCTCAGCAGCGAGGCGGCGGCGGCTGCGGAGGCGC-AGGCAGCAACTGAGGCAGCGGAGGCTCAGGTGC  
Celf1      GATTCGGCCTCAGCAGCGA--GGCAGCGGCGGCTGCGGAGGAGCAAGGCAGCAGCTGAGGCAGCGGCGGCTCAGGTGC
```

241-320

```
CELF1      AGCCGCTG-----  
Celf1      AGCCGCTGGAAGCTAAAGCTGTGTATATTTGTGGATCAGACAAGTGCAAGTATTATCATTGGCTTCTGAAGGGGAG
```

321-400

```
CELF1      -----  
Celf1      AGTGAGGTGATGGCTGCGTTTAAGTTGGATTTCCAGAAATGATGGTGGATCATTGCTCTTTGAATTCAGTCTCTGT
```

401-480

CELF1 CTCAAAGAAAATGAACGGCACCTGGACCACCCAGACCAACCAGATCTTGATGCTATCAAGATGTTTGTGGGCCAGGTTCC  
Ce1f1 CTCAAAGAAAATGAACGGCACCTGGACCACCCAGACCAACCAGATCTTGATGCTATCAAGATGTTTGTGGGCCAGGTTCC

481-560

CELF1 CAAGGACCTGGTCTGAAAAGGACTTGCGGAACTCTTCAACAGTATGGTGTGTGTATGAAATCAACGTCCTAAGGGAT  
Ce1f1 CAAGGACCTGGTCTGAGAAAGACTTGAGGGAGCTTTTGGAGCAGTATGGTGTGTCTATGAAATCAACATCCTAAGGGAT

561-640

CELF1 AGGAGCCAAAACCCGCTCAGAGCAAAGGGTGTGTTTTGTTACATTTTACACCCGTAAAGCTGCATTAGAAGCTCAGAA  
Ce1f1 AGGAGCCAAAACCCCTCCTCAGAGCAAAGGGTGTGTTTTGTTACATTTTACACCCGTAAAGCTGCATTAGAAGCTCAGAA

641-720

CELF1 TGCTCTTACAACATGAAAGTCCTCCAGGGATGCATCACCCATACAGATGAAACCTGCTGACAGTGAGAAGAACAATG  
Ce1f1 TGCTCTCCATAACATGAAGGTCCTCCCTGGGATGCATCACCCATACAGATGAAGCCTGCTGACAGTGAAAAGAACAATG

721-800

CELF1 CAGTGAAGACAGGAAGCTGTTTATTGGTATGATTTCCAAGAAGTCACTGAAAATGACATCCGAGTCATGTTCTCTTCG  
Ce1f1 CTGTGAAGACAGGAAGCTCTTATTGGTATGATTTCCAAGAAGTGTACTGAAAATGACATCCGAGTCATGTTTCTCTTCG

801-880

CELF1 TTTGGACAGATTGAAGAATGCCGGATATTGCGGGGACCTGATGGCCTGAGCCGAGGTTGTGCATTTGTGACTTTTACAAC  
Ce1f1 TTTGGACAGATTGAAGAGTGCCGGATATTGCGGGGACCTGATGGCCTGAGCAGAGGTTGTGCATTTGTGACTTTTACTAC

881-960

CELF1 AAGAGCCATGGCACAGACGGCTATCAAGCAATGCACCAAGCACAGACCATGGAGGGTTGCTCATCACCATGGTGGTAA  
Ce1f1 AAGAACCATGGCACAGACAGCTATCAAAGCAATGCACCAAGCACAAACCATGGAGGGTTGCTCATCCCAATGGTGGTAA

961-1040

CELF1 AATTTGCTGATACAGAAGGACAAAGAACAGAAGAGaatggccagcagctccagcagCAGATGCAGCAAAATCAGCGCA  
Ce1f1 AGTTTGCCGACACCAGAAGGACAAAGAACAGAAGAGAATGGCCAGCAGCTCCAGCAGCAGATGCAGCAGATCAGTGCA

1041-1120

CELF1 GCATCTGTGTGGGAAACCTTGCTGGTCTAAATACTCTTGACCCAGTATTAGCA-----CTCCTTCAGCA  
Ce1f1 GCGTCTGTGTGGGAAACCTTGCTGGTCTGAACACACTTGACCCAGTACTTAGCACTTTATTTGCAGCTCTACAGCA

1121-1200

CELF1 GACTGCCTCCTCTGGGAACCTCAACACCCTGAGCAGCCTCCACCCAATGGGAGGGTTGAATGCAATGCAGTTACAGAATT  
Ce1f1 GACTGCCTCCTCTGGGAACCTCAACACCCTGAGCAGCCTCCACCCAATGGGAGGGTTAAATGCAATGCAGTTACAGAATT

1201-1280

CELF1 TGGCTGCACTAGCTGCTGCAGCTAGTGCAGCTCAGAACACACCAAGTGGTACCAATGCTCTCACTACATCCAGCAGTCCC  
Ce1f1 TGGCTGCACTAGCTGCTGCAGCTAGTGCAGCTCAGAACACACCAAGTGGTACCAATGCTCTCACTACATCCAGCAGTCCC

1281-1360

CELF1 CTCAGCGTGCTCACTAGTTCAGGGTCCTCACCTAGCTCTAGCAGCAGTAATTCTGTCAACCCCATAGCCTCACTTGGAGC  
Ce1f1 CTCAGCGTACTCACCAGTTCAGGGTCTTCACCGAGCTCCAGCAGCAGTAATTCTGTCAACCCCATAGCCTCACTTGGAGC

1361-1440

CELF1 CCTGCAGACATTAGCTGGAGCAACGGCTGGCCTCAATGTTGGCTCTTTGGCAGGAATGGCTGCCTTAAATGGTGGCCTGG  
Ce1f1 CCTGCAAACATTGGCCGGAGCAACAGCTGGCCTCAACGTTGGCTCATTGGCAGGGATGGCTGCCTTGAATGGTGGTCTGG

1441-1520

CELF1 GCAGCAGTGGCCTTTCCAATGGCACCAGGGAGCACCATGGAGGCCCTCACTCAGGCCTACTCGGGTATCCAGCAATATGCT  
Ce1f1 GCAGCAGTGGCCTTTCCAATGGCACTGGGAGTACCATGGAAGCCCTCACCAGGCGTATTCTGGTATCCAGCAATATGCT

1521-1600

CELF1 GCTGCTGCGCTCCCCTCTGTACAACCAGAATCTTCTGACACAGCAGAGTATTGGTGCCTGGAAGCCAGAAGGAAGG  
Ce1f1 GCTGCAGCCCTCCCCTCTGTACAACCAGAATTTATTGACACAGCAGAGTATTGGTGCCTGGAAGCCAGAAGGAAGG

1601-1680

CELF1 TCCAGAGGGAGCCAACCTGTTTACCTACACCTGCCCCAGGAGTTTGGTGATCAGGACCTGCTGCAGATGTTTATGCCCT  
Ce1f1 TCCAGAAGGAGCCAACCTGTTTACCTATCACCTGCCCCAGGAGTTTGGAGACCAGGACTTACTGCAGATGTTTATGCCCT

1681-1760

CELF1 TTGGGAATGTCGTGTCTGCCAAGGTTTTTCATAGACAAGCAGACAAAACCTGAGCAAGTGTTTTGGTTTTGTAAGTTACGAC  
Ce1f1 TTGGGAATGTCGTGTCTGCCAAGGTTTTTCATAGACAAGCAGACAAAACCTGAGCAAGTGTTTTGGTTTTGTAAGTTATGAC

1761-1840

CELF1 AATCCTGTTTTCGGCCAAGCTGCCATCCAGTCCATGAACGGCTTTCAGATTGGCATGAAGCGGCTTAAAGTGCAGCTCAA  
Ce1f1 AATCCTGTCTCAGCTCAAGCTGCCATCCAGTCCATGAACGGCTTTCAAATGGAATGAAGAGGCTTAAAGTGCAGCTCAA

1841-1920

CELF1 ACGTTTGAAGAATGACAGCAAGCCCTACTGAGCGTGCTCCCCTCTGAGACTGGAGTGAGAGGGTCTTCTGATTCTCTGCCG  
Ce1f1 ACGTTTGAAGAATGATAGTAAGCCCTACTGA--GTGCTCCCCTCTGAGACTGGAGTGAGAAGATCTTCTGATTCTCTGCCG

1921-2000

CELF1 TTTGTTTCATCGTTGTGCCTAAAGCATGTCGATGTGGCGTCAAGTACATCGTCCAAATCCCTGTCTCTTCAGCTTCTCTGA  
Ce1f1 TTTGTTTCATCGTTGTGCCTAAAGCATGTCGATGTGGCGTCAAGTACATCGTCCAAATCCCTGTCTCTTCAGCTTCTCTGA

2001-2080

CELF1 TGCTTGAACCTCTCACCTTTGACCTTGTTGACCTTTGATGCTGATGTGATTTTTATTATGTTTGTCTTTCTTCTCGTT  
Ce1f1 TGCTTGAACCTCTCACCTTTGACCTTGTTGACCTTTGATGCTGATGTGTA-TTTTATTATGTTTGTCTTTCTTCTTGT

2081-2160

CELF1 TTTTTTCTTTTTTCTTTCCCTTTTTTTTCCCTTTTGTGCTGCCAAATGGTTTTGCTAGAACGACTGCTGAAGGGGAAA  
Ce1f1 TTTTCTTTTTTCTTTCTTT-TTTTTTTTCCCTTTTGTGCTGCCAAATGGTTTTGCTAGAACGACTGCTGAAGGGGAAA



2161-2240

CELF1 TATTTAAACTGCATTTGAATAT-AAAAAAATCTATTTTCTAGAACTTCATAAGATAAACCACTTGATTTGTGATTCC  
Ce1f1 TATTTAAACTGCATTTGAATATAAAAAAAATCTATTTTCTAGAACTTCATAAGATAAACCACTTGATTTGTGATTCC

2241-2320

CELF1 AATTCTTTGTAATTGTCTTCAGAGCAGCCCTACTAGCACATACCGCGTGGTGTGTTGTATTCTGTGAACACACAGCCAGT  
Ce1f1 AATTCTTTGTAACGTGC-TCAGAGCAGCCCTACTAGCACATGCGGTGGTGTGTTGTATCCTTGTGAACACACAGCCAGT

2321-2400

CELF1 CCGTTTCTAGGCTTTGTTTCTCTGTGTGCTTAGTTTTAAAGACAACCTTGAAGTAAACAATGAAATAAAAGATGTCACCTA  
Ce1f1 CCGCTCCAGGCTTTGTTCTCTGTGTGCTTAGTTTTAAAGACAACCTTGAATAAACAATGAAATAAAAGATGTCACCTA

2401-2480

CELF1 AAACCTCTGAGGCTCCTGAGCACATTTGCTGATACAGTCTGTGGGCTTGAGGAGACCGCATGTATTGTTCTTCTTTT  
Ce1f1 AAATCTTTGAGGCTCCTGAACACATTTGCTGACATAGTTT-TGGGGCTTGAGGAGACCGCATG--TTGTTATTAATTT-

2481-2560

CELF1 GTTTTTCTTCTGAGTTCTCAACTGCGGAGA-----GCACCTGAACCCCTTTCCTTTTGGACCGAGGCTGCA  
Ce1f1 -TTGTTTTCTGAGTTCTCAACTGCAGAAAATGCTGAAATACACCCTTACCCCATTCCTTTTACTGAATGCTGAG

2561-2640

CELF1 CTTTGGGCCCAGCCAGCCCTTTTCTTTTTCTTTTTCTTTTGTGGTTCTTCCCTGGAGCGACTCT---GGGGAGTCTCTG  
Ce1f1 GTTTGGGCCCAGCTAGCC-----TTTTTCTTTTTCTTTTGTGGTTCTT-CCTGAAGCAGCCCTGCAGGAAGCCCTA

2641-2720

CELF1 GA--TATCCCGCCTGCCCTTCCCCTCAGC-----CCCATGCTTGTCCAACAGTCTCCACAGCAAAATGT  
Ce1f1 GGGTCCCTCTTCCCCTCCCCTCCCCTCGGCTCAGCCAGCTCACACCCGTGCTTCTTCTACAGTCTCCACAGCAAAATGT

2721-2800

CELF1 GATGCTTTGATTTTTTTGTTGTTGTTTTGTTTTGTTTGTATTGTTTTGTTTGTGTTTTGTTTTGAAATTTTTCTTTCTACTA  
Ce1f1 GATGCTTTCAACTT-----TTTTGGGTTTTGTTT-CTTTGCCTTTTTGTTTTGAA-TTTTTCTTTCTACTA

2801-2880

CELF1 AGATTATGCCAGAAAA---AAGTTTTGCATGTTTCTGCTGTTTCTTACACCTTCGTATATATCACCTTCACCTCTCT  
Ce1f1 AGATTATGCCAGAAAAACAAGTTGTCATGTTTCTGCTGTTTCTTACACCTTCGTATATATCACCTTCACCTCTCT

2881-2960

CELF1 GTTTTCTATAGTTTGTGCAAAAAGTATCGATTTAAAGGGTTTCAAAGAAGCTGTTTTAAATTGTTGTAGGGTTGATTA  
Ce1f1 GTTTTCTATAGTTTGTGCAAAAAGTACTGATTTAAAGGGTTTCAAAGAAGATGTTTTAAATTGTTATGGGGTTGATTT

2961-3040

CELF1 TTTTTTCAAGATTGATTTGTTAATTTTGAAGTGGCAACTTTCCTCTATTGCCCTTAGAGCGTTTGCCTGTGCACTT  
Ce1f1 TTTTTCTCAAGATTGATCGTTTTATTTTGAAGTGGCAACTTTCCTCTATTGCCCTTAGAGTGTGTTGCCTGTGCACTT

3041-3120

CELF1 AGACTGTCACTTCGT---GTGGCCTCCAGGTCTTACCGGGGCTCCGGGAGGCTGGCTGCTTTGCTCAGAGAGGGTGGGA  
Ce1f1 AGACTGTCACTCTTTGTGGTGGCTCCAGGTCTCAGTGGGGATCCAGGAGGCTGGCTGCTCTGCTCAGGGAGTACAGGG

3121-3200

CELF1 AGGGGGCCTGGAGAGACACGAGAAGCAGAGGTAGAGCCTAGAAGGTGGCAGCAGGTGGGTAAGAGGCTTATTTAGCACAT  
Ce1f1 GG-----CCAGAGGCAGAAGCAGAACC--AAAGGTGGCTGTGGGTAGGCAGGA----TGCTTAGGGCAT

3201-3280

CELF1 TAGGGGCAGTGAGCACCTGGAGGAA-----GGAGGGCGCTCCCAATCACCCGTAGGAGGCCATCTGCACACCAAGCG  
Ce1f1 CAAGGCTAGATCACGGAGGGAGGGAGGGCAGGCGGGCAGTACTTCTGATTACCCAGAGGAGGCCATCGGTGCACTGAGTG

3281-3360

CELF1 GCAAT----TCACCTGCTGGCGCTTTTCTAGGTGACAAGCAC----AATACTACAGTCTTCACACTGTTTACAGCCCTG  
Ce1f1 GCAATATACCTGCCTGCCTGGCTTTCCCTAGGTGACAAGCACAATAAATACTACAGTCTTCACACTGTTTACAGCTCTG

3361-3440

CELF1 GGCACCAGCCACCCGGCACTGGCTCTTCATCACAGCTCTGCTCTTGCTTAGCTAGTGGGGTGGGGAAAGGGCAGGGATT  
Ce1f1 GGCACCAACCACCCGGCACTGGCTCTTCACTATGGCTCTGCTCTTACTTAGCTAATAGAGTTGGGGTAAGGGCAAGAAAC

3441-3520

CELF1 TGTTTTTTTAATTGGGTGGAGAGCCAAACAGCTACTGTCCCTGGGTGCCAAGCAAGCCAGTTTTTTGGTTCCTGAGGGA  
Ce1f1 TG-TTTTTAAATTGGGTGAAGAGCCAGATAGCTACTGTTCCTGGGTGCCAGGCCAGCCAGTTCTTTGGTTCCTAAGGGA

3521-3600

CELF1 AACTGACCTCCTCTCTTGTGGCACCATCCAGCCTCAGGGTCTTGGAGACTTGAGTAAGAATGTGAGTGGAGGGGAGAG  
Ce1f1 AACTTACCTCCTCTCTTGTAGCACCATCCAGCCTCAGGGTCTTGGGACTTGG--AAGAATGTAATAGAGGAGGAGAG

3601-3680

CELF1 GT--GAGGAGAGGAGCACA---GGTGGATCTGTGGAGGAAGAGGTTACAGGGGAGGAGCTGATGATAGATCCCACCC  
Ce1f1 GCTAGAGGAAATGAGTAGACAGGGATGGATCTGTGAAGAGCAGAGGCTGCAGGG---AGGATTTTACAGATCCCCTG

3681-3760

CELF1 AGACTTAAGCTGCTGGTGGTGGGTGAGCTGGGAAGTAGGACTGTCCAGGGAAGGGTGGAGAGATGTAGCTAGGGGCTGG  
Ce1f1 AGACTTAAGC-ACTGGTGGGAGGAAAGT--GGAAGCAAGGTTGTCCAGGAAAGGGTGGCAAGGTGCAGCAAAGGATGGG

3761-3840

CELF1 GGAGGGGAGGTGGAAGCGCTATTGAGCATCTCCACCAAGGTTGATGAAGGAAGGGATCCCAGCAGGGTTTCTGCTC  
Ce1f1 GGTGGGGAG---AGAAGCACGGTCTGGCATCATCCACTCTCTGCCTGGTG--TTGAAGGAACTCCAGCACAGTTTCTGCTC

3841-3920

CELF1 TGGGG--CTGGCAGGTTGCCTG--GTATTATGCCAAGGCCCTCTGCTGGGGAAAGGGCAGCCAGGCAGAGGCCCCAG  
Ce1f1 TGGGACCCCTACAGGTTGCCAATATATTATGCTTGAGGCCACCTTACTAGGAAGAAATGGCAGCCAAAGTGGGGGAC---

3921-4000

CELF1 TGCTCTGGTAGGCTGCTGAATTCCTGGAAGGGGTGATTGGATGGAAAGAGGCCAGAAACCCAGCCTGAGAGA--CTGCT  
Ce1f1 --TTAAGTATGCTGCTTAAGGTCTGGAAGGGGTGGTAGGATGCCAGCG-----CCTAGCATGAGAGAGCCTGCT

4001-4080

CELF1 GTGCACCCACAGTCTGACTGCACAGAGCCGCTCTGTGGCAGGAGGCACTGAGGCTCCCTTCCTGTGTATTGAGAAG  
Ce1f1 GTGTG-CCCACAGTCTGACTGCACAGAG-CGCTCTGTGGCAGGAGGTGCTGCGG-TCCCTTCCTGTGTACTGAGAAG

4081-4160

CELF1 CAGTGTTTGCCAATATATTTTGCTTTCAATTCCAAGAGGAGCTCTGGGAAAACCTGTGGATAAAACCAAATGCCAAATGT  
Ce1f1 CTGGGCTTGCCAATATAGTTTGCTTTGATTCCAAGAGGAGCTCTGGGAAAACCTGTGGATAAAACCAAATGCCAAATGT

4161-4240

CELF1 TGGACGTTGTTTCCTTTTCCTTTCTCTCTGATTGTTTAAATTGTTCTGTGGTGGTTTAAATGGATTTGAGACCCTGG  
Ce1f1 TGGACATTGTTTCCTTTTCCTTT--TCTCTCTGATTGTTTAAATTGTTCCGTAGTGGTTTAAATGGATTTGAGACCCTGG

4241-4320

CELF1 AGCGGCAGCTGCCTTTCTGATTTCAGCTGCTTTTTGTGAATAATTTAAAAAGAAAAAAAAAAAAAGAACTTTACATTTTG  
Ce1f1 AGCGGCAGCTGCCTTTCTGATTTCAGCTGCTTTTTGTGAATAATTTAAAAAG-AAAAAAAAAAAAAGAACTTTACATTTTG

4321-4400

CELF1 GAGACAAACCTGTGTGAGTTTTTATTGGTACAAACGTTGTATTTAACACTAGGGGTTTTGTACAGTTTTTTGCCTTTTC  
Ce1f1 GAGACAAACCTGTGTGAGTTTTTATTGGTACAAACGTTGTATTTAACACTAGGGGTTTTGTACAGTTTTTTGCCTTTTC

4401-4480

CELF1 TACTAGAAAACAATGTAAGTGATTTCACAATGTGAAGAGAAAAAAATGCCACTATGACCAAACGCACAGTCTGTTC  
Ce1f1 TACTAGAAAACAATGTAAGTGATTTCACAATGTGAAGAG--AAAAAATGCCACTATGACCAAACGCACAGTCTGTTC

4481-4560

CELF1 TGCAGCAACAACGGGATTCAATCAACT--AGTCGTATTAGCCGTAGAAATGCTTTTCCTTTATCTGTTTGTAGCTTT  
Ce1f1 TGCAGCAACAACGGGATTCAATCAACTCAAAGTCGTATTAGCCGTAGAAATGCTTTT-CCTGACCTTGTGTAGCTTT

4561-4640

CELF1 TCCTTTCTTTCTGTTTTGATTGCAAAAGAAAATGCTTTTTTGTGTGAACTTGTGTTGACTCTGTAGAAAATTATGG  
Ce1f1 --CCTTTTCTCTG-TTTGATTATAAAAG--ATGCTTTTGTGTGAACTTGTGTTGACTCTGTAGAAAATTATGG

4641-4720

CELF1 ATTTTACTTTAATGGTTT-----AAAAAAGGCAAGGAGAGCCCTCGTCGCTTTTCTTACCTAATCACAGAGTTTGT  
Ce1f1 ATTTTGTCTTAATGGTTTTTAAAAAAGGCAAGGAGAGCCCGTGTGCTTTTCTTACCTAATCAC--AGTTTGT

4721-4800

CELF1 GTAGTGAATTTAAAAAGAAAAAAATTTGTTATAAGTTTGGAGCAAGGGAGTATGTGTTTCAAAGGAATCTCCTTCCTTT  
Ce1f1 GTAGTGGATT--AAAAAAGAAAAAGTTGTTATAAGTTTGGAGCAAGGGAGTATGTGTTTAAAAAGACTCTCCTTC--T

4801-4880

CELF1 TTTTGTGTGTTTTTCCTTTTGTCCAATGGGGAACCTAAATCTGTTTAAATTGCACAGACACATGGACAAAAAGTCATT

Ce1f1 TTTTGTGTGTTTTTCCTTTTGTCCAATGGGGAACCTAAATCTGTTTAAATTGCACAGACACAGACAAAAAGTCATT

4881-4960

CELF1 TGTATCTGCCAAGTGTGGTACCTTCCTTTGTTTATTGCTATTAAACTGTTGAGAAGAACTGA-----

Ce1f1 TGTATCTGCCAAGTGTGGTACCTTCCTTTGTTTATTGCTATTAAACTGTTGAGAAGAAAAAAAAAAAAAAAAAAAAA

## References

Madeira, et al., The EMBL-EBI search and sequence analysis tools APIs in 2019, *Nucleic Acids Res*, 47 (2019) W636-W641.DOI: 10.1093/nar/gkz268.
