# Supplementary material
Source: PubMed Central journal article supplement (PMC8432742)
Supplement: NIHMS1699344-supplement-Suppl_2.pdf [file NIHMS1699344-supplement-Suppl_2.pdf]

## Supplementary Files 1

for

### **lncRNA *TUG1* as a ceRNA promotes PM exposure-induced airway hyper-reactivity**

Bin Li <sup>a</sup>, Nannan Huang <sup>a</sup>, Shengnan Wei <sup>a</sup>, Jie Xv <sup>a</sup>, Qingtao Meng <sup>b</sup>, Xiaobo Li <sup>a\*</sup>,

Rui Chen <sup>b, c, \*</sup>

<sup>a</sup> Key Laboratory of Environmental Medicine Engineering, Ministry of Education, School of Public Health, Southeast University, Nanjing, 210009, P.R. China

<sup>b</sup> Department of Toxicology and Sanitary chemistry, School of Public Health, Capital Medical University, Beijing 100069, P.R. China

<sup>c</sup> Institute for Chemical Carcinogenesis, Guangzhou Medical University, Guangzhou, 511436, P.R. China

\* Corresponding to: Key Laboratory of Environmental Medicine Engineering, Ministry of Education, School of Public Health, Southeast University, Dingjiaqiao 87, Nanjing, 210009, China. E-mail address: 101011116@seu.edu.cn (X. Li);

or

Department of Toxicology and Sanitary chemistry, School of Public Health, Capital Medical University, Xitoutiao 10, Beijing, 100069, China. E-mail address: 101011816@seu.edu.cn (R. Chen).

Fig. S1.

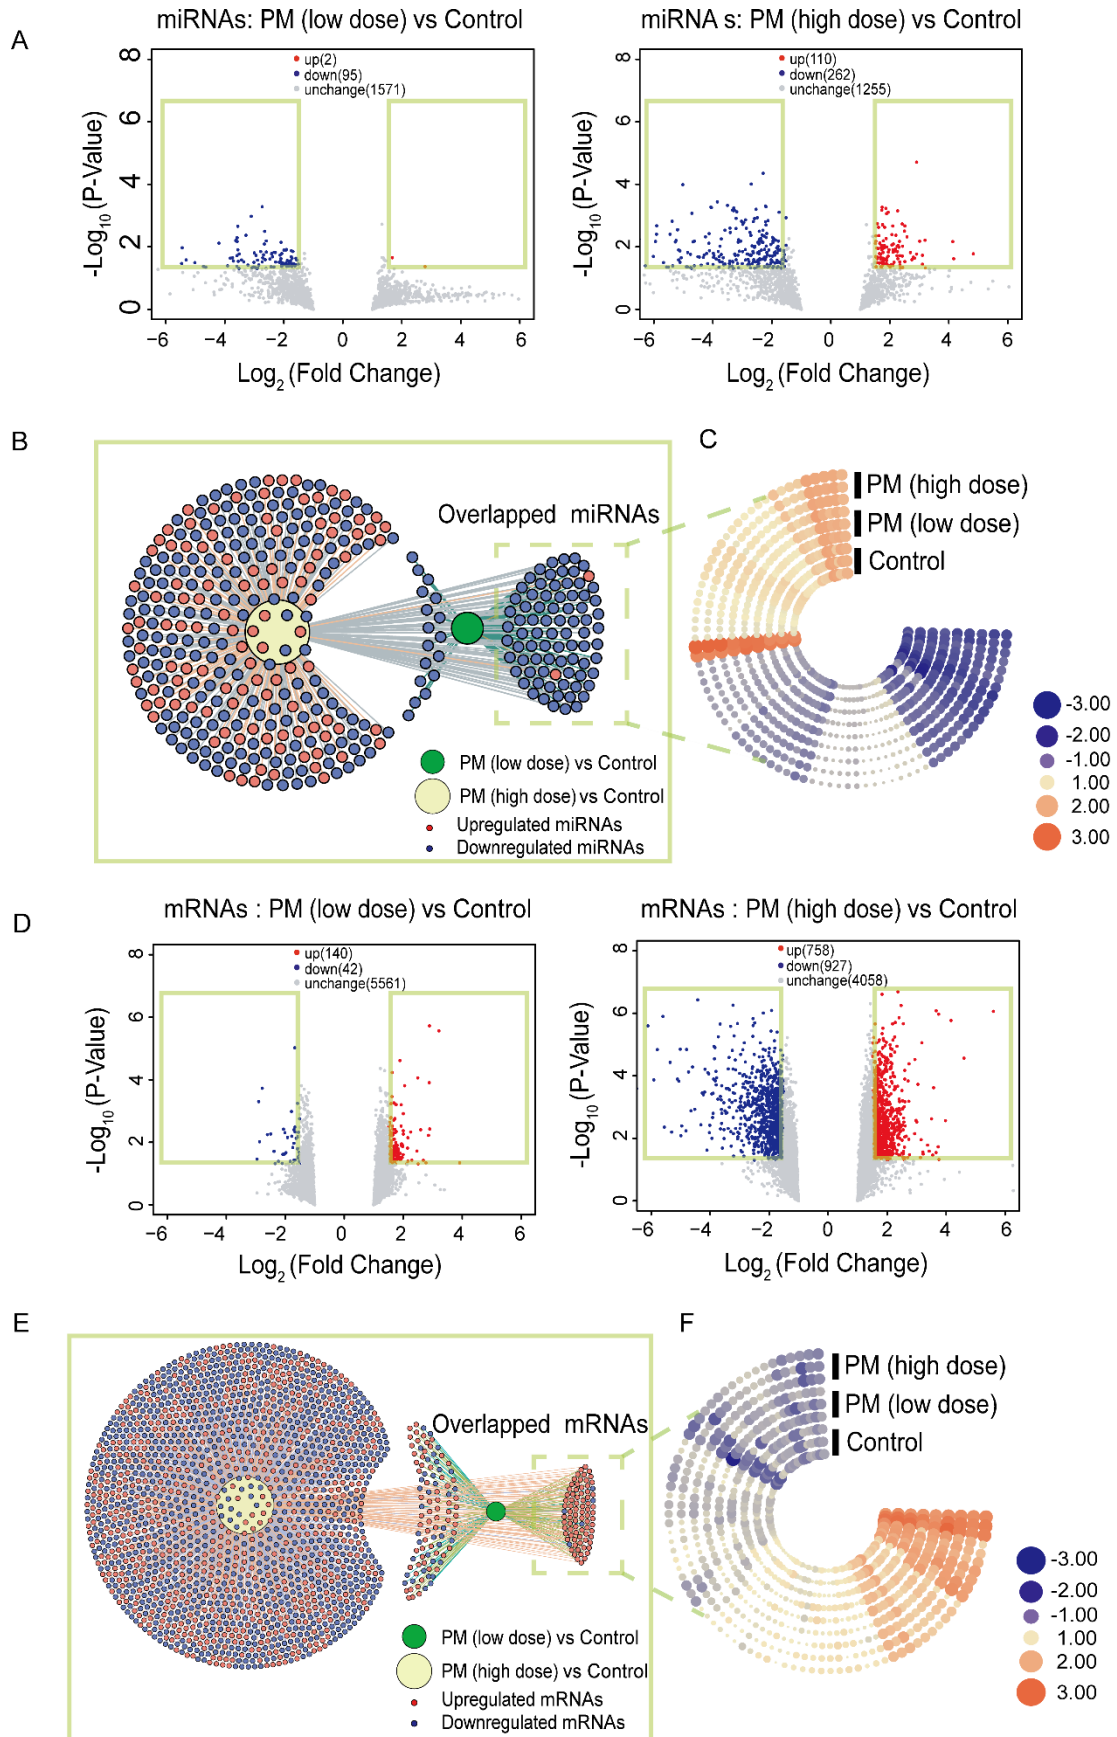

**Fig. S1. Differentially expressed miRNAs and mRNAs in HBE cells following PM exposure**

(A, D) The volcano plots revealed differentially expressed miRNAs and mRNAs in HBE cells between the PM-treated and control groups, with a cut-off as fold change  $\geq 1.5$  and  $P$ -value  $< 0.05$ .

(B, E) Network diagram showed the overlapped differentially expressed miRNAs and mRNAs between PM (low dose) and PM (high dose) group. Each red or blue point represent a single upregulated or downregulated miRNA or mRNA, respectively.

(C, F) The heatmap showed expression levels of overlapped miRNAs and mRNAs in HBE cells. Each arc represents a cellular sample, each column represents a miRNA or mRNA. The color code represents expression level: red or blue color represent higher or lower expression levels relative to the control, respectively.

Fig. S2.

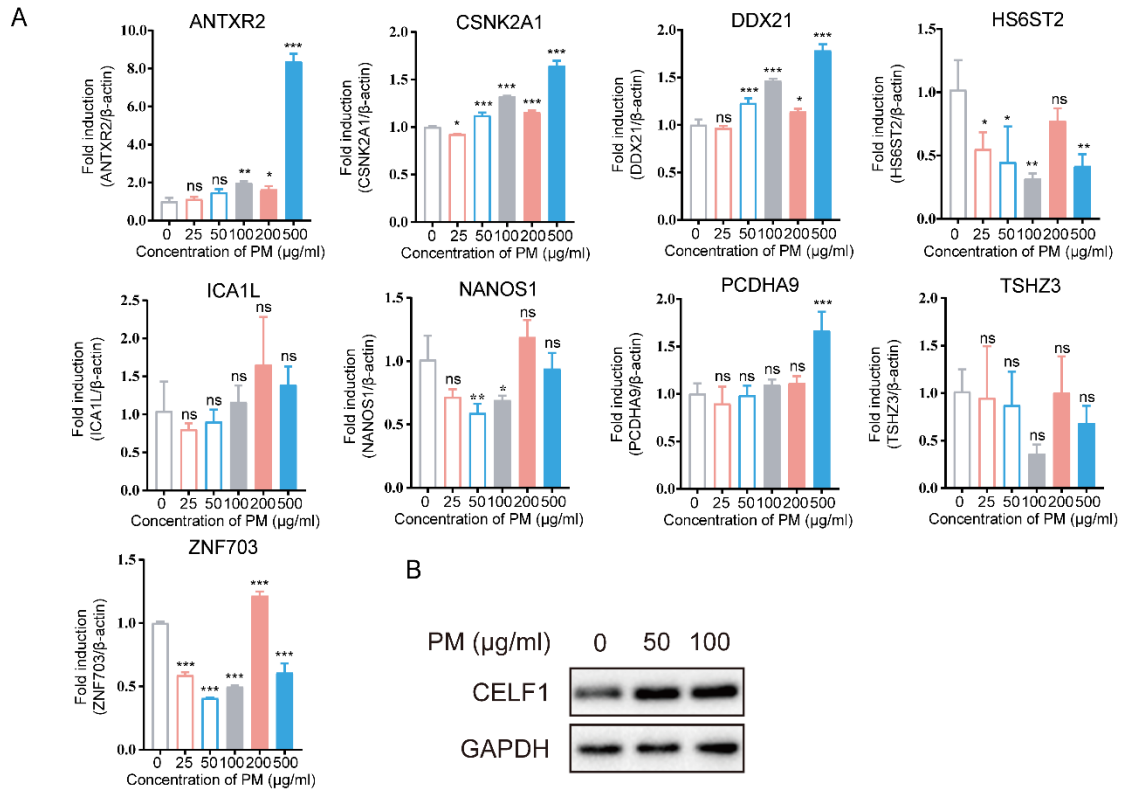

**Fig. S2. Expression levels of mRNAs in HBE cells following PM exposure**

(A) Quantitative RT-PCR analysis of 9 mRNAs expression levels in HBE cells.  $\beta$ -actin was used as a normalization control. \*  $P < 0.05$ , \*\*  $P < 0.01$ , \*\*\*  $P < 0.001$ , compared with control.

(B) Protein levels of CELF1 in HBE cells exposed to PM (0, 50 or 100  $\mu\text{g/ml}$ ).

Fig. S3.

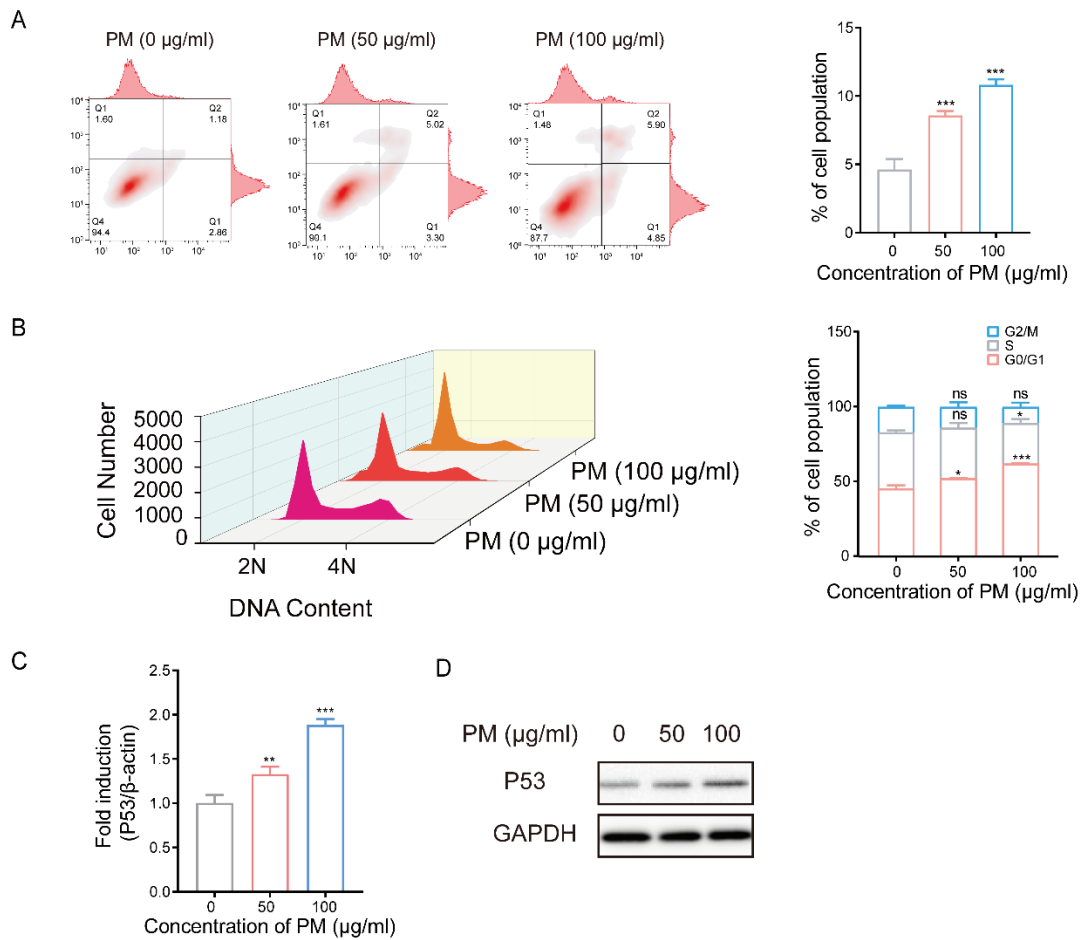

**Fig. S3. PM exposure-induced apoptosis, cell cycle arrest, and activation of p53 in HBE cells**

(A-B) Flow cytometric analysis of apoptosis and cell cycle in HBE cells exposed to PM (0, 50 or 100 µg/ml). \*  $P < 0.05$ , \*\*\*  $P < 0.001$ , compared with control. The cell cycle is divided into distinct consecutive phases defined as quiescent state and first gap phase(G0/G1), DNA synthesis phase (S), second gap phase and mitosis phase (G2/M). 2N represents G0/G1 and 4N represents G2/M while 2N-4N represents S.

(C-D) mRNA and protein levels of p53 in HBE cells exposed to PM (0, 50 or 100 µg/ml). \*\*  $P < 0.01$ , \*\*\*  $P < 0.001$ , compared with control.

Fig. S4.

A

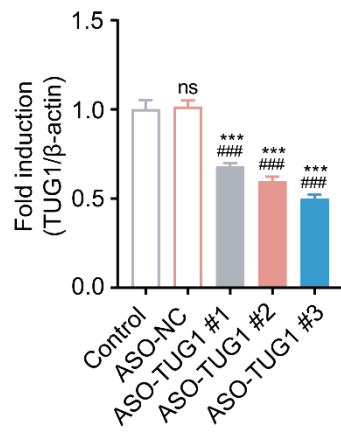

**Fig. S4. Evaluating the knockdown efficiency of ASOs**

(A) Quantitative RT-PCR analysis of *TUG1* expression levels in HBE cells treated with different

*ASO-TUG1*. \*\*\*  $P < 0.001$ , compared with control; ###  $P < 0.001$ , compared with *ASO-NC*.

Fig. S5.

A

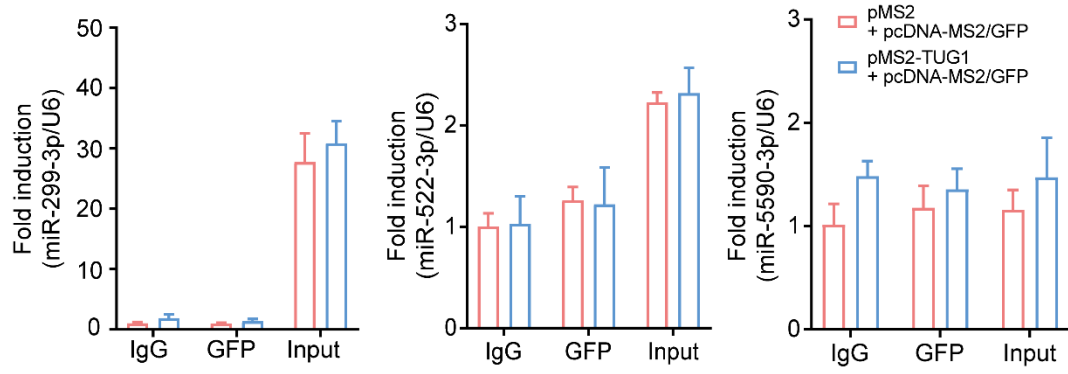

**Fig. S5. Identification of miRNAs bound to *TUG1***

(A) miRNAs levels bound to GFP in HBE cells.

Fig. S6.

A

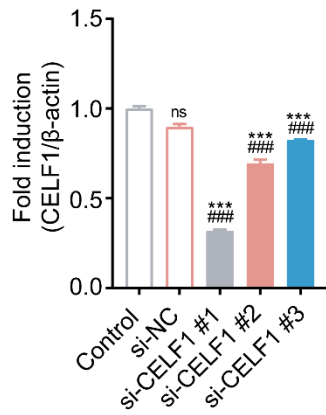

**Fig. S6. Knockdown efficiency of siRNAs**

(A) Quantitative RT-PCR analysis of *CELF1* expression levels in HBE cells treated with different

*si-CELF1*. \*\*\*  $P < 0.001$ , compared with control; ###  $P < 0.001$ , compared with *si-NC*.



Fig. S7.

A

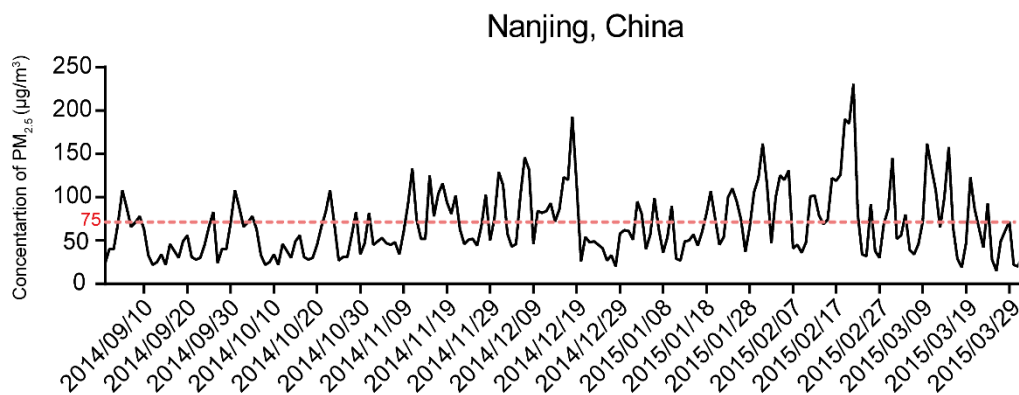

B

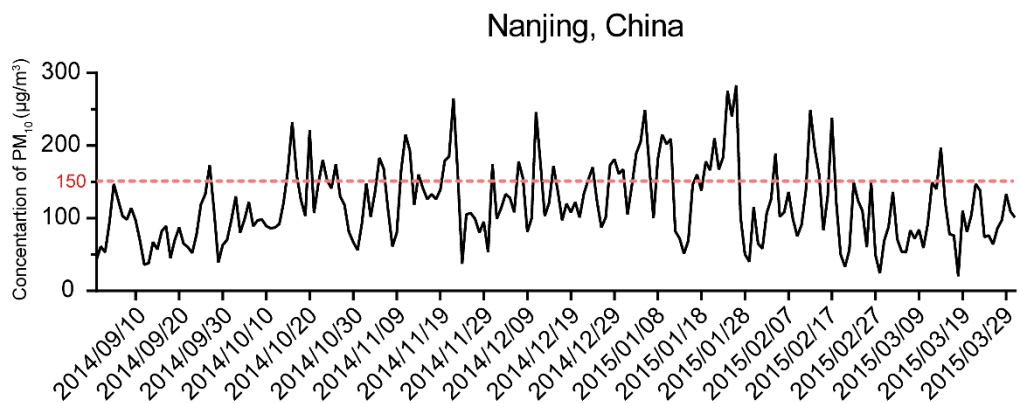

**Fig. S7. Daily concentration of PM in Nanjing, China, from September 2014 to March 2015**

(A) Daily concentration of PM<sub>2.5</sub> in Nanjing, China, from September 2014 to March 2015. The grade II limit value (75 µg/m<sup>3</sup>) of Daily PM<sub>2.5</sub> was set by National Ambient Air Quality Standards of China (GB3095-2012).

(B) Daily concentration of PM<sub>10</sub> in Nanjing, China, from September 2014 to March 2015. The grade II limit value (150 µg/m<sup>3</sup>) of Daily PM<sub>10</sub> was set by National Ambient Air Quality Standards of China (GB3095-2012).

**Table S1. The differentially expressed lncRNAs in HBE cells following PM exposure**

| lncRNAs                          | Regulation | Fold change                 |                              | <i>P</i> -value             |                              |
|----------------------------------|------------|-----------------------------|------------------------------|-----------------------------|------------------------------|
|                                  |            | PM (low dose)<br>vs Control | PM (high dose)<br>vs Control | PM (low dose)<br>vs Control | PM (high dose)<br>vs Control |
| <i>LOC100506895</i>              | down       | 1.562                       | 1.666                        | 0.004                       | < 0.001                      |
| <i>RP11-382B18.3</i>             | down       | 1.569                       | 1.642                        | 0.033                       | 0.003                        |
| <i>RP11-385M4.1</i>              | down       | 1.682                       | 2.967                        | < 0.001                     | < 0.001                      |
| <i>RP4-773N10.4</i>              | down       | 1.502                       | 1.528                        | 0.014                       | 0.006                        |
| <i>AC002066.1</i>                | up         | 1.595                       | 2.470                        | 0.015                       | 0.002                        |
| <i>AC006538.1</i>                | up         | 1.604                       | 1.886                        | 0.032                       | 0.010                        |
| <i>AC012307.2</i>                | up         | 1.661                       | 2.047                        | 0.047                       | < 0.001                      |
| <i>AC018642.1</i>                | up         | 2.112                       | 1.680                        | 0.004                       | 0.006                        |
| <i>AC025627.7</i>                | up         | 2.068                       | 2.729                        | 0.027                       | < 0.001                      |
| <i>AC098971.2</i>                | up         | 1.569                       | 1.508                        | 0.036                       | 0.041                        |
| <i>ANKRD36B</i>                  | up         | 2.760                       | 3.123                        | 0.007                       | 0.002                        |
| <i>BC021061</i>                  | up         | 1.607                       | 2.146                        | 0.022                       | < 0.001                      |
| <i>BC133032</i>                  | up         | 1.759                       | 2.335                        | 0.021                       | 0.005                        |
| <i>CD27-AS1</i>                  | up         | 2.261                       | 1.799                        | < 0.001                     | 0.004                        |
| <i>chr13:104871700-104904225</i> | up         | 1.896                       | 2.265                        | 0.002                       | 0.003                        |
| <i>chr3:72052025-72073225</i>    | up         | 1.652                       | 1.750                        | 0.041                       | 0.030                        |
| <i>chr8:66160600-66171525</i>    | up         | 2.181                       | 1.895                        | 0.002                       | < 0.001                      |
| <i>chrX:115315750-115327875</i>  | up         | 2.406                       | 1.752                        | 0.003                       | < 0.001                      |
| <i>CTB-174D11.1</i>              | up         | 1.775                       | 2.409                        | 0.040                       | 0.004                        |
| <i>CTD-2071N1.1</i>              | up         | 1.746                       | 1.619                        | 0.042                       | 0.032                        |
| <i>CTD-2517M22.14</i>            | up         | 2.532                       | 1.944                        | 0.023                       | 0.037                        |
| <i>DKFZp686L08115</i>            | up         | 1.886                       | 1.967                        | 0.005                       | < 0.001                      |
| <i>DLX6-AS1</i>                  | up         | 1.696                       | 1.667                        | 0.033                       | < 0.001                      |
| <i>FLJ36000</i>                  | up         | 1.617                       | 1.716                        | 0.032                       | 0.002                        |
| <i>GPC5-IT1</i>                  | up         | 1.835                       | 2.162                        | 0.009                       | 0.033                        |
| <i>HMlincRNA463</i>              | up         | 1.922                       | 2.282                        | 0.019                       | < 0.001                      |
| <i>HMlincRNA937</i>              | up         | 2.594                       | 2.303                        | < 0.001                     | < 0.001                      |
| <i>HV041854</i>                  | up         | 1.702                       | 1.904                        | 0.006                       | < 0.001                      |
| <i>JA040725</i>                  | up         | 1.726                       | 1.665                        | 0.029                       | < 0.001                      |
| <i>LOC100292680</i>              | up         | 1.582                       | 3.177                        | 0.004                       | < 0.001                      |
| <i>LOC100499489</i>              | up         | 1.769                       | 2.279                        | 0.031                       | 0.001                        |
| <i>LOC100506451</i>              | up         | 1.777                       | 1.998                        | 0.012                       | < 0.001                      |
| <i>LOC399744</i>                 | up         | 1.805                       | 2.268                        | 0.021                       | < 0.001                      |
| <i>LOC400084</i>                 | up         | 1.918                       | 2.502                        | 0.045                       | < 0.001                      |
| <i>MEG3</i>                      | up         | 1.763                       | 1.702                        | 0.010                       | 0.001                        |

|                        |    |       |       |         |         |
|------------------------|----|-------|-------|---------|---------|
| <i>MGC21881</i>        | up | 1.572 | 1.817 | 0.008   | < 0.001 |
| <i>MT1DP</i>           | up | 1.571 | 3.981 | 0.001   | < 0.001 |
| <i>MT1P2</i>           | up | 1.769 | 4.005 | < 0.001 | < 0.001 |
| <i>MTE</i>             | up | 1.707 | 4.823 | 0.040   | < 0.001 |
| <i>NCOR1P1</i>         | up | 1.782 | 2.221 | 0.035   | < 0.001 |
| <i>RP11-1078H9.6</i>   | up | 1.945 | 2.122 | 0.009   | < 0.001 |
| <i>RP11-111F5.4</i>    | up | 1.745 | 2.177 | 0.028   | 0.003   |
| <i>RP11-116G8.5</i>    | up | 2.170 | 1.902 | 0.018   | 0.018   |
| <i>RP11-122C21.1</i>   | up | 5.244 | 3.678 | 0.004   | < 0.001 |
| <i>RP11-211N8.2</i>    | up | 1.513 | 1.574 | 0.009   | < 0.001 |
| <i>RP11-228B15.4</i>   | up | 1.680 | 1.836 | 0.025   | < 0.001 |
| <i>RP11-244H18.2</i>   | up | 1.884 | 1.953 | 0.024   | < 0.001 |
| <i>RP11-261C10.3</i>   | up | 1.781 | 2.306 | 0.039   | < 0.001 |
| <i>RP11-289F5.1</i>    | up | 1.592 | 2.142 | 0.043   | 0.004   |
| <i>RP11-294K24.4</i>   | up | 1.527 | 1.833 | 0.037   | < 0.001 |
| <i>RP11-305E6.1</i>    | up | 1.714 | 2.243 | 0.037   | < 0.001 |
| <i>RP11-323P17.1</i>   | up | 1.738 | 2.474 | 0.025   | 0.001   |
| <i>RP11-356C4.2</i>    | up | 1.602 | 1.632 | 0.027   | 0.007   |
| <i>RP11-395B7.4</i>    | up | 1.802 | 2.112 | 0.039   | < 0.001 |
| <i>RP11-407A16.3</i>   | up | 1.502 | 2.027 | 0.038   | < 0.001 |
| <i>RP11-442N24_B.1</i> | up | 1.693 | 1.583 | 0.007   | 0.003   |
| <i>RP11-475I24.3</i>   | up | 1.590 | 2.161 | 0.032   | < 0.001 |
| <i>RP11-524K14.1</i>   | up | 1.792 | 2.461 | 0.023   | < 0.001 |
| <i>RP11-545P7.4</i>    | up | 1.793 | 1.779 | 0.005   | 0.003   |
| <i>RP11-552E20.1</i>   | up | 2.469 | 2.013 | < 0.001 | < 0.001 |
| <i>RP11-631B21.1</i>   | up | 1.773 | 2.278 | 0.042   | < 0.001 |
| <i>RP11-693N9.2</i>    | up | 1.944 | 1.818 | 0.037   | 0.010   |
| <i>RP11-756P10.5</i>   | up | 1.782 | 2.996 | 0.014   | 0.001   |
| <i>RP11-818F20.5</i>   | up | 1.612 | 2.025 | 0.004   | 0.002   |
| <i>RP11-89M22.3</i>    | up | 2.172 | 2.268 | 0.008   | < 0.001 |
| <i>RP11-8P11.3</i>     | up | 1.642 | 1.636 | 0.003   | < 0.001 |
| <i>RP1-276N6.2</i>     | up | 1.820 | 2.319 | 0.007   | < 0.001 |
| <i>RP3-475N16.1</i>    | up | 1.823 | 2.103 | 0.024   | < 0.001 |
| <i>RP4-738P15.1</i>    | up | 2.007 | 2.334 | 0.013   | < 0.001 |
| <i>RP4-758J18.10</i>   | up | 2.389 | 2.297 | 0.041   | 0.034   |
| <i>SCARNA9</i>         | up | 2.298 | 1.682 | < 0.001 | 0.002   |
| <i>tAKR</i>            | up | 2.282 | 2.061 | 0.017   | < 0.001 |
| <i>TPT1-AS1</i>        | up | 1.928 | 1.782 | 0.008   | 0.002   |
| <i>TUG1</i>            | up | 1.559 | 1.520 | 0.010   | 0.008   |
| <i>XLOC_000535</i>     | up | 1.779 | 2.639 | 0.040   | < 0.001 |
| <i>XLOC_001195</i>     | up | 1.685 | 2.142 | 0.035   | < 0.001 |
| <i>XLOC_001223</i>     | up | 1.906 | 2.319 | 0.018   | < 0.001 |
| <i>XLOC_001341</i>     | up | 2.589 | 2.003 | 0.038   | 0.033   |
| <i>XLOC_001943</i>     | up | 1.586 | 2.588 | 0.026   | 0.002   |

|                    |    |       |       |         |         |
|--------------------|----|-------|-------|---------|---------|
| <i>XLOC_002727</i> | up | 1.723 | 1.857 | 0.010   | < 0.001 |
| <i>XLOC_006039</i> | up | 1.613 | 1.734 | < 0.001 | 0.012   |
| <i>XLOC_006348</i> | up | 1.679 | 2.029 | 0.032   | < 0.001 |
| <i>XLOC_006486</i> | up | 1.880 | 1.644 | < 0.001 | 0.039   |
| <i>XLOC_006978</i> | up | 1.778 | 1.672 | < 0.001 | < 0.001 |
| <i>XLOC_007865</i> | up | 1.746 | 2.037 | 0.018   | < 0.001 |
| <i>XLOC_008852</i> | up | 2.016 | 2.509 | 0.046   | < 0.001 |
| <i>XLOC_009952</i> | up | 2.860 | 3.930 | 0.012   | 0.007   |
| <i>XLOC_011660</i> | up | 2.042 | 2.593 | 0.018   | 0.023   |
| <i>XLOC_011751</i> | up | 2.926 | 4.102 | 0.025   | 0.010   |
| <i>XLOC_012111</i> | up | 1.651 | 1.819 | 0.002   | < 0.001 |
| <i>XLOC_012216</i> | up | 1.928 | 1.975 | 0.031   | 0.002   |
| <i>XLOC_012626</i> | up | 1.659 | 1.794 | 0.015   | < 0.001 |
| <i>XLOC_012840</i> | up | 1.924 | 2.290 | 0.006   | < 0.001 |
| <i>XLOC_013448</i> | up | 1.681 | 1.682 | 0.020   | 0.021   |
| <i>XLOC_013778</i> | up | 1.719 | 2.128 | 0.010   | < 0.001 |
| <i>XLOC_014105</i> | up | 1.522 | 1.839 | 0.048   | < 0.001 |
| <i>ZNF876P</i>     | up | 1.743 | 1.611 | 0.006   | 0.005   |
| <i>ZNRD1-AS1</i>   | up | 1.767 | 2.418 | 0.029   | < 0.001 |
| <i>ZNRD1-AS1</i>   | up | 1.558 | 1.797 | 0.034   | < 0.001 |
| <i>ZSCAN18</i>     | up | 1.672 | 1.945 | 0.028   | 0.002   |

---

**Table S2. The differentially expressed miRNAs in HBE cells following PM exposure**

| miRNAs                  | Regulation | Fold change                 |                              | P-value                     |                              |
|-------------------------|------------|-----------------------------|------------------------------|-----------------------------|------------------------------|
|                         |            | PM (low dose)<br>vs Control | PM (high dose)<br>vs Control | PM (low dose)<br>vs Control | PM (high dose)<br>vs Control |
| <i>bkv-miR-B1-5p</i>    | down       | 3.740                       | 7.098                        | 0.023                       | 0.012                        |
| <i>ebv-miR-BART1-3p</i> | down       | 1.934                       | 4.676                        | 0.034                       | 0.007                        |
| <i>ebv-miR-BART3-3p</i> | down       | 1.880                       | 3.409                        | 0.027                       | 0.003                        |
| <i>ebv-miR-BART4-3p</i> | down       | 2.784                       | 6.501                        | 0.014                       | 0.006                        |
| <i>hsa-miR-126-3p</i>   | down       | 1.905                       | 2.303                        | 0.038                       | 0.007                        |
| <i>hsa-miR-1286</i>     | down       | 2.715                       | 4.135                        | 0.022                       | 0.008                        |
| <i>hsa-miR-1301-3p</i>  | down       | 1.600                       | 2.102                        | 0.037                       | 0.013                        |
| <i>hsa-miR-1307-5p</i>  | down       | 1.660                       | 2.953                        | 0.038                       | 0.002                        |
| <i>hsa-miR-138-1-3p</i> | down       | 2.595                       | 5.273                        | 0.015                       | 0.007                        |
| <i>hsa-miR-143-3p</i>   | down       | 2.733                       | 5.194                        | 0.030                       | 0.003                        |
| <i>hsa-miR-148a-5p</i>  | down       | 3.584                       | 5.201                        | 0.005                       | 0.003                        |
| <i>hsa-miR-152-5p</i>   | down       | 3.077                       | 5.163                        | 0.047                       | 0.026                        |
| <i>hsa-miR-16-1-3p</i>  | down       | 1.549                       | 3.419                        | 0.027                       | 0.003                        |
| <i>hsa-miR-16-2-3p</i>  | down       | 1.671                       | 2.303                        | 0.034                       | 0.003                        |
| <i>hsa-miR-182-3p</i>   | down       | 2.435                       | 8.420                        | 0.043                       | 0.002                        |
| <i>hsa-miR-185-5p</i>   | down       | 2.069                       | 2.842                        | 0.037                       | 0.017                        |
| <i>hsa-miR-188-3p</i>   | down       | 5.018                       | 11.718                       | 0.032                       | 0.013                        |
| <i>hsa-miR-190a-5p</i>  | down       | 2.596                       | 7.142                        | 0.006                       | <0.001                       |
| <i>hsa-miR-194-3p</i>   | down       | 1.697                       | 1.781                        | 0.035                       | 0.007                        |
| <i>hsa-miR-222-3p</i>   | down       | 1.912                       | 2.628                        | 0.012                       | 0.002                        |
| <i>hsa-miR-24-2-5p</i>  | down       | 1.722                       | 2.263                        | 0.023                       | 0.004                        |
| <i>hsa-miR-299-3p</i>   | down       | 2.661                       | 2.445                        | 0.008                       | 0.007                        |
| <i>hsa-miR-301a-3p</i>  | down       | 2.733                       | 5.020                        | <0.001                      | <0.001                       |
| <i>hsa-miR-30c-1-3p</i> | down       | 1.810                       | 1.982                        | 0.029                       | 0.020                        |
| <i>hsa-miR-30c-2-3p</i> | down       | 2.288                       | 4.067                        | 0.015                       | <0.001                       |
| <i>hsa-miR-3156-5p</i>  | down       | 3.592                       | 7.599                        | 0.042                       | 0.008                        |
| <i>hsa-miR-32-5p</i>    | down       | 2.385                       | 7.769                        | 0.021                       | 0.004                        |
| <i>hsa-miR-330-3p</i>   | down       | 2.337                       | 2.468                        | 0.044                       | 0.026                        |
| <i>hsa-miR-33a-3p</i>   | down       | 1.828                       | 2.587                        | 0.035                       | 0.001                        |
| <i>hsa-miR-345-5p</i>   | down       | 2.072                       | 2.893                        | 0.016                       | 0.001                        |
| <i>hsa-miR-3619-3p</i>  | down       | 1.773                       | 2.247                        | 0.028                       | 0.012                        |
| <i>hsa-miR-3660</i>     | down       | 1.978                       | 3.714                        | 0.037                       | 0.006                        |
| <i>hsa-miR-3663-5p</i>  | down       | 3.709                       | 7.090                        | 0.029                       | 0.012                        |
| <i>hsa-miR-370-5p</i>   | down       | 2.943                       | 11.566                       | 0.019                       | 0.006                        |
| <i>hsa-miR-374a-3p</i>  | down       | 2.151                       | 8.992                        | 0.031                       | <0.001                       |
| <i>hsa-miR-374b-5p</i>  | down       | 1.580                       | 1.831                        | 0.026                       | 0.027                        |
| <i>hsa-miR-3934-5p</i>  | down       | 3.544                       | 8.596                        | 0.029                       | 0.014                        |
| <i>hsa-miR-4436a</i>    | down       | 2.473                       | 2.715                        | 0.025                       | 0.018                        |

|                          |      |       |        |       |        |
|--------------------------|------|-------|--------|-------|--------|
| <i>hsa-miR-4474-5p</i>   | down | 3.560 | 5.383  | 0.002 | 0.002  |
| <i>hsa-miR-4476</i>      | down | 3.908 | 6.520  | 0.041 | 0.022  |
| <i>hsa-miR-4489</i>      | down | 2.604 | 6.977  | 0.050 | 0.008  |
| <i>hsa-miR-4490</i>      | down | 2.886 | 3.978  | 0.048 | 0.022  |
| <i>hsa-miR-4501</i>      | down | 1.931 | 2.201  | 0.013 | 0.002  |
| <i>hsa-miR-4504</i>      | down | 3.435 | 8.866  | 0.026 | 0.005  |
| <i>hsa-miR-4506</i>      | down | 3.014 | 2.433  | 0.032 | 0.027  |
| <i>hsa-miR-4520-2-3p</i> | down | 5.446 | 16.993 | 0.011 | 0.004  |
| <i>hsa-miR-4520-3p</i>   | down | 5.312 | 21.082 | 0.026 | 0.012  |
| <i>hsa-miR-4522</i>      | down | 3.521 | 4.856  | 0.049 | 0.015  |
| <i>hsa-miR-452-5p</i>    | down | 1.603 | 1.959  | 0.039 | 0.006  |
| <i>hsa-miR-466</i>       | down | 3.589 | 17.156 | 0.019 | 0.005  |
| <i>hsa-miR-4691-3p</i>   | down | 4.201 | 10.599 | 0.008 | <0.001 |
| <i>hsa-miR-4694-3p</i>   | down | 1.746 | 2.353  | 0.021 | 0.007  |
| <i>hsa-miR-4755-3p</i>   | down | 2.904 | 7.500  | 0.050 | 0.003  |
| <i>hsa-miR-4758-5p</i>   | down | 3.358 | 2.894  | 0.030 | 0.026  |
| <i>hsa-miR-4999-3p</i>   | down | 2.632 | 7.356  | 0.026 | 0.002  |
| <i>hsa-miR-5009-3p</i>   | down | 3.584 | 10.959 | 0.007 | 0.003  |
| <i>hsa-miR-500a-5p</i>   | down | 2.128 | 3.131  | 0.018 | 0.006  |
| <i>hsa-miR-5011-3p</i>   | down | 3.002 | 3.262  | 0.016 | 0.017  |
| <i>hsa-miR-505-5p</i>    | down | 1.500 | 2.213  | 0.036 | 0.002  |
| <i>hsa-miR-5095</i>      | down | 2.689 | 5.244  | 0.018 | 0.006  |
| <i>hsa-miR-5189-5p</i>   | down | 3.515 | 4.629  | 0.017 | 0.007  |
| <i>hsa-miR-522-3p</i>    | down | 1.828 | 3.216  | 0.041 | 0.003  |
| <i>hsa-miR-551b-3p</i>   | down | 1.630 | 3.295  | 0.040 | <0.001 |
| <i>hsa-miR-552-3p</i>    | down | 2.095 | 2.711  | 0.007 | 0.004  |
| <i>hsa-miR-5590-3p</i>   | down | 2.099 | 2.315  | 0.024 | 0.025  |
| <i>hsa-miR-582-3p</i>    | down | 2.330 | 3.848  | 0.015 | <0.001 |
| <i>hsa-miR-598-3p</i>    | down | 2.410 | 3.055  | 0.016 | 0.007  |
| <i>hsa-miR-604</i>       | down | 3.285 | 5.904  | 0.004 | 0.002  |
| <i>hsa-miR-618</i>       | down | 1.996 | 2.191  | 0.013 | 0.009  |
| <i>hsa-miR-7-5p</i>      | down | 1.744 | 2.702  | 0.013 | <0.001 |
| <i>hsa-miR-760</i>       | down | 2.073 | 2.898  | 0.042 | 0.012  |
| <i>hsa-miR-802</i>       | down | 3.558 | 5.912  | 0.012 | 0.004  |
| <i>hsa-miR-875-3p</i>    | down | 3.815 | 29.930 | 0.023 | 0.005  |
| <i>hsa-miR-93-3p</i>     | down | 3.029 | 5.074  | 0.044 | 0.022  |
| <i>hsa-miR-93-5p</i>     | down | 2.043 | 3.292  | 0.032 | <0.001 |
| <i>hsa-miR-96-5p</i>     | down | 1.723 | 3.212  | 0.034 | 0.001  |
| <i>hsa-miRPlus-C1100</i> | down | 3.630 | 5.451  | 0.006 | 0.004  |
| <i>kshv-miR-K12-7-5p</i> | down | 2.849 | 10.478 | 0.038 | 0.003  |
| <i>hsa-miR-2113</i>      | up   | 1.677 | 1.864  | 0.022 | <0.001 |

|                                                       |    |       |       |       |        |
|-------------------------------------------------------|----|-------|-------|-------|--------|
| <i>hsa-miR-548aa/hsa-miR-548ap-3p/hsa-miR-548t-3p</i> | up | 2.788 | 2.906 | 0.043 | <0.001 |
|-------------------------------------------------------|----|-------|-------|-------|--------|

---

**Table S3. The differentially expressed mRNAs in HBE cells following PM exposure**

| mRNAs           | Regulation | Fold change                 |                              | P-value                     |                              |
|-----------------|------------|-----------------------------|------------------------------|-----------------------------|------------------------------|
|                 |            | PM (low dose)<br>vs Control | PM (high dose)<br>vs Control | PM (low dose)<br>vs Control | PM (high dose)<br>vs Control |
| <i>ARSI</i>     | down       | 1.663                       | 1.586                        | 0.037                       | 0.009                        |
| <i>CENPW</i>    | down       | 1.567                       | 1.939                        | 0.007                       | 0.002                        |
| <i>HS6ST2</i>   | down       | 1.579                       | 1.522                        | 0.016                       | 0.025                        |
| <i>NME1</i>     | down       | 1.581                       | 1.577                        | <0.001                      | <0.001                       |
| <i>SMARCA4</i>  | down       | 1.562                       | 1.700                        | 0.030                       | 0.024                        |
| <i>ABCF1</i>    | up         | 1.507                       | 1.889                        | 0.003                       | <0.001                       |
| <i>AMPD1</i>    | up         | 1.836                       | 2.979                        | 0.018                       | 0.003                        |
| <i>ANTXR2</i>   | up         | 1.652                       | 1.515                        | 0.031                       | 0.021                        |
| <i>APIB1</i>    | up         | 1.807                       | 2.142                        | 0.019                       | <0.001                       |
| <i>BTNL2</i>    | up         | 1.979                       | 2.010                        | 0.014                       | <0.001                       |
| <i>C9orf86</i>  | up         | 2.900                       | 2.397                        | 0.004                       | 0.007                        |
| <i>CCDC47</i>   | up         | 1.553                       | 1.665                        | 0.013                       | <0.001                       |
| <i>CCL1</i>     | up         | 1.790                       | 2.241                        | 0.033                       | <0.001                       |
| <i>CEACAM21</i> | up         | 1.702                       | 2.119                        | 0.040                       | <0.001                       |
| <i>CEBPD</i>    | up         | 1.700                       | 2.185                        | <0.001                      | <0.001                       |
| <i>CELF1</i>    | up         | 1.710                       | 2.130                        | 0.016                       | <0.001                       |
| <i>CHRFAM7A</i> | up         | 3.915                       | 3.756                        | 0.046                       | 0.048                        |
| <i>CLEC1B</i>   | up         | 1.725                       | 2.165                        | 0.038                       | <0.001                       |
| <i>COASY</i>    | up         | 1.935                       | 1.652                        | <0.001                      | 0.002                        |
| <i>CSNK2A1</i>  | up         | 1.655                       | 1.974                        | 0.019                       | 0.016                        |
| <i>CYP11A1</i>  | up         | 1.546                       | 2.356                        | 0.041                       | 0.002                        |
| <i>DDX21</i>    | up         | 1.685                       | 1.511                        | <0.001                      | <0.001                       |
| <i>ELOVL5</i>   | up         | 1.586                       | 1.842                        | 0.019                       | <0.001                       |
| <i>FAM174B</i>  | up         | 1.596                       | 1.758                        | 0.009                       | 0.002                        |
| <i>FCAR</i>     | up         | 1.591                       | 1.717                        | 0.011                       | <0.001                       |
| <i>FCAR</i>     | up         | 1.696                       | 1.809                        | 0.027                       | <0.001                       |
| <i>FCAR</i>     | up         | 1.581                       | 2.002                        | 0.041                       | 0.001                        |
| <i>FKBP6</i>    | up         | 2.681                       | 2.587                        | 0.038                       | 0.019                        |
| <i>GDF5</i>     | up         | 1.998                       | 2.743                        | 0.025                       | <0.001                       |
| <i>GSDMA</i>    | up         | 1.544                       | 1.912                        | 0.002                       | <0.001                       |
| <i>HDAC1</i>    | up         | 1.940                       | 1.952                        | 0.013                       | 0.001                        |
| <i>HFE</i>      | up         | 1.520                       | 1.820                        | 0.017                       | <0.001                       |
| <i>HIST1H1C</i> | up         | 1.618                       | 1.765                        | <0.001                      | <0.001                       |
| <i>ICAIL</i>    | up         | 1.714                       | 2.102                        | 0.022                       | <0.001                       |
| <i>JUN</i>      | up         | 1.601                       | 2.368                        | 0.005                       | <0.001                       |
| <i>KANSL2</i>   | up         | 1.580                       | 2.113                        | 0.006                       | <0.001                       |
| <i>KIAA1161</i> | up         | 1.565                       | 2.109                        | 0.037                       | <0.001                       |
| <i>L3MBTL2</i>  | up         | 1.564                       | 1.697                        | 0.020                       | 0.010                        |
| <i>LLPH</i>     | up         | 1.582                       | 1.844                        | <0.001                      | 0.001                        |



|                |    |       |       |        |        |
|----------------|----|-------|-------|--------|--------|
| <i>LYL1</i>    | up | 2.000 | 1.939 | 0.004  | 0.005  |
| <i>LYZL4</i>   | up | 2.049 | 1.687 | <0.001 | <0.001 |
| <i>MAGOH</i>   | up | 2.495 | 3.177 | <0.001 | <0.001 |
| <i>MBIP</i>    | up | 1.627 | 1.731 | 0.003  | <0.001 |
| <i>MCHR1</i>   | up | 1.620 | 2.141 | 0.024  | <0.001 |
| <i>MCM7</i>    | up | 2.589 | 2.184 | 0.004  | 0.001  |
| <i>MON1A</i>   | up | 1.700 | 1.996 | 0.008  | <0.001 |
| <i>MSH5</i>    | up | 1.634 | 2.196 | 0.026  | <0.001 |
| <i>MT1F</i>    | up | 3.212 | 5.601 | <0.001 | <0.001 |
| <i>MT1G</i>    | up | 2.888 | 4.972 | <0.001 | <0.001 |
| <i>MT1X</i>    | up | 2.881 | 4.606 | <0.001 | <0.001 |
| <i>NANOS1</i>  | up | 1.554 | 1.570 | 0.024  | 0.033  |
| <i>NIT1</i>    | up | 1.540 | 1.602 | 0.014  | 0.011  |
| <i>NLRP7</i>   | up | 1.756 | 2.258 | 0.019  | <0.001 |
| <i>NR0B1</i>   | up | 1.761 | 2.547 | <0.001 | <0.001 |
| <i>NR1I2</i>   | up | 2.254 | 2.259 | 0.005  | <0.001 |
| <i>OCIAD2</i>  | up | 1.729 | 2.474 | 0.038  | <0.001 |
| <i>PAX9</i>    | up | 1.574 | 1.542 | 0.034  | 0.027  |
| <i>PCDHA9</i>  | up | 2.159 | 1.887 | 0.007  | 0.004  |
| <i>PI4K2B</i>  | up | 1.929 | 1.513 | 0.003  | 0.009  |
| <i>PIH1D1</i>  | up | 1.895 | 2.404 | 0.023  | <0.001 |
| <i>PILRA</i>   | up | 1.670 | 2.279 | 0.036  | <0.001 |
| <i>RASGRP1</i> | up | 1.652 | 1.729 | 0.006  | <0.001 |
| <i>REG3A</i>   | up | 1.696 | 1.991 | 0.015  | <0.001 |
| <i>RHBDL2</i>  | up | 2.859 | 2.523 | 0.006  | 0.001  |
| <i>SAA1</i>    | up | 2.116 | 3.153 | 0.049  | 0.011  |
| <i>SEPT8</i>   | up | 1.794 | 2.333 | 0.017  | <0.001 |
| <i>SIRPB1</i>  | up | 1.595 | 1.779 | 0.021  | <0.001 |
| <i>SLC25A5</i> | up | 1.516 | 2.151 | 0.028  | <0.001 |
| <i>SPRR2B</i>  | up | 1.505 | 1.676 | 0.024  | <0.001 |
| <i>SRFBP1</i>  | up | 1.653 | 2.374 | 0.048  | 0.002  |
| <i>TLR3</i>    | up | 1.785 | 2.267 | 0.036  | <0.001 |
| <i>TMEM249</i> | up | 2.772 | 2.129 | 0.045  | 0.028  |
| <i>TOMM40</i>  | up | 1.946 | 2.133 | 0.011  | <0.001 |
| <i>TPPI</i>    | up | 1.800 | 1.636 | 0.018  | 0.011  |
| <i>TSHZ3</i>   | up | 1.881 | 2.256 | 0.036  | <0.001 |
| <i>TUBA1C</i>  | up | 1.557 | 1.759 | 0.030  | <0.001 |
| <i>VEPH1</i>   | up | 1.798 | 2.172 | 0.013  | <0.001 |
| <i>ZNF34</i>   | up | 1.685 | 1.602 | 0.002  | <0.001 |
| <i>ZNF534</i>  | up | 1.651 | 1.964 | 0.023  | <0.001 |
| <i>ZNF678</i>  | up | 1.571 | 1.614 | 0.005  | <0.001 |
| <i>ZNF703</i>  | up | 1.555 | 1.886 | 0.018  | <0.001 |

---

**Table S4. Primer sequences used for qRT-PCR assay**

| RNAs               | Forward Primer (5'-3')    | Reverse Primer (5'-3')    |
|--------------------|---------------------------|---------------------------|
| <i>hsa-TUG1</i>    | AGGTAGAACCTCTATGCATTTTGTG | ACTCTTGCTTCACTACTTCATCCAG |
| <i>hsa-MEG3</i>    | GGGCATTAAGCCCTGACCTT      | CCTTGGGGAGGGGAAACACTC     |
| <i>hsa-CELF1</i>   | ATGGCACAGACGGCTATCAAGG    | CACAGATGCTGCGCTGATTTGC    |
| <i>hsa-JUN</i>     | CCTTGAAAGCTCAGAACTCGGAG   | TGCTGCGTTAGCATGAGTTGGC    |
| <i>hsa-ICAIL</i>   | TCATGTGGCTGGAGCGTTCAAC    | CTTTGGACTCTGTGAAGGCACTG   |
| <i>hsa-HS6ST2</i>  | CTCTCCGTCATCCACAAAGACC    | CAGGGATGCTTTCCATGTTGCC    |
| <i>hsa-CSNK2A1</i> | GGTGAGGATAGCCAAGGTTCTG    | TCACTGTGGACAAAGCGTTCCC    |
| <i>hsa-PCDHA9</i>  | CTGCCACATCTTCACGGTGTCT    | TGCACTGACACGTAGCTCGACA    |
| <i>hsa-DDX21</i>   | TGGACTCAGAGGGCAGCAGTTA    | TGTCTCCATGCAAGGACTGAGC    |
| <i>hsa-NANOS1</i>  | GCTCTACACCACCCATATCCTC    | GTACTTGATGGTGTGCGCGTTG    |
| <i>hsa-ANTXR2</i>  | TCGGAATGGCAGTGTCTCTGC     | CAGGATAGGTGCAGGACAAAGC    |
| <i>hsa-ZNF703</i>  | TGCAGCCGCTGTCCTCCACTC     | CACCGAGTTGAGTTTGGAGGAG    |
| <i>hsa-TSHZ3</i>   | CACCTACCATCACAACCCTGCT    | CGACTTCCTTCTTGACCTCCAC    |
| <i>hsa-p53</i>     | ACCTATGGAAACTACTTCTGAAA   | ACATCTTGTTGAGGGCAGGG      |
| <i>hsa-β-actin</i> | ATCCGCAAAGACCTGT          | GGGTGTAACGCAACTAAG        |
| <i>hsa-U6</i>      | CTCGCTTCGGCAGCACA         | AACGCTTCACGAATTTGCGT      |
| <i>mmu-Tug1</i>    | CTCTGGAGGTGGACGTTTTGT     | GTGAGTCGTGTCTCTCTTTTCTC   |
| <i>mmu-Celf1</i>   | CAGGCGTATTCTGGTATCCAGC    | GAACAGGTTGGCTCCTTCTGGA    |
| <i>mmu-p53</i>     | CCCCTGAAGACTGGATAACTGT    | GGACGGAAGATGACAGAGGC      |
| <i>mmu-β-actin</i> | GGCTGTATTCCCCTCCATCG      | CCAGTTGGTAACAATGCCATGT    |

**Table S5. Target sequences of ASOs or siRNAs**

| ASOs/siRNAs         | Target Sequence (5'-3') |
|---------------------|-------------------------|
| <i>ASO-TUG1 #1</i>  | CTCAAATGATTGAAATTCATG   |
| <i>ASO-TUG1 #2</i>  | AATCTTTGAACAGCACCATT    |
| <i>ASO-TUG1 #3</i>  | ATCTAGGAGTCTGTATACTG    |
| <i>si-CELF1 #1</i>  | CTTCGTTTGGACAGATTGA     |
| <i>si-CELF1 #2</i>  | CTCAGCGTGCTCACTAGTT     |
| <i>si-CELF1 #3</i>  | TGGCACAGACGGCTATCAA     |
| <i>ASO-mmu-Tug1</i> | CAGTCTGAGGTCTTGACTTG    |
